# Supplementary material for: Integrative Analysis Identifies Cell-Type-Specific Genes Within Tumor Microenvironment as Prognostic Indicators in Hepatocellular Carcinoma
Source: Front Oncol. 2022 May 30;12:878923. doi: 10.3389/fonc.2022.878923 (PMC9190278; doi:10.3389/fonc.2022.878923)
Supplement: Supplementary file 1 [file DataSheet_1.xlsx]

## Sheet: Sheet1
Table S1. The clinical characteristics of the HCC cohorts
	GSE14520	CPTAC	GSE76427	Our cohort
Gender (Male)	87.19% (211/242)	80.5% (128/159)	80.87% (93/115)	87.50% (28/32)
Age	(29.50, 72.18)	(32.32, 75.06)	(38.59, 88.31)	(26.38, 75.37)
3-year recurrence rate	46.69% (113/242)	48.42% (77/159)	36.52% (42/115)	56.25% (18/32)
BCLC stage
0	8.26% (20/242)	0% (0/159)	3.48% (4/115)	15.63% (5/32)
A	62.81% (152/242)	42.77% (68/159)	64.35% (74/115)	62.50% (20/32)
B	9.92% (24/242)	32.70% (52/159)	24.35% (28/115)	12.50% (4/32)
C	11.08% (29/242)	24.53% (39/159)	7.83% (9/115)	9.37% (3/32)
TNM stage
I	42.67% (96/225)	57.23% (91/159)	48.25% (55/114)	40.63% (13/32)
II	34.67% (78/225)	8.81% (14/159)	30.70% (35/114)	34.37% (11/32)
III	22.67% (51/225)	32.70% (52/159)	18.42% (21/114)	25.00% (8/32)
IV	0% (0/225)	1.26% (2/159)	2.63% (3/114)	0% (0/32)
