# Supplementary material for: Integrative Analysis Identifies Cell-Type-Specific Genes Within Tumor Microenvironment as Prognostic Indicators in Hepatocellular Carcinoma
Source: Front Oncol. 2022 May 30;12:878923. doi: 10.3389/fonc.2022.878923 (PMC9190278; doi:10.3389/fonc.2022.878923)
Supplement: Supplementary file 3 [file DataSheet_3.xlsx]

## Sheet: Supplementary Table Sxx
Table S3. The RNA expression of the eight features and clinical characteristics in our cohort
ID	PLCB1	FASLG	IL2RB	SLC22A7	B3GAT3	EEF1D	NRP1	STX11	RFS_time	RFS	BCLC	TNM	Gender	Age
1	0.883414	0.354321	0.409537	0.946569	0.474678	1.033	0.432779	0.388493	20	1	0	I	Male	36
2	0.710728	0.313855	0.454307	1.03989	0.422879	0.962575	0.516485	0.362776	23.9	1	A	II	Male	73
3	0.541271	0.317223	0.52694	0.437715	0.420302	1.02261	0.724405	0.371396	7.3	0	A	I	Female	60
4	0.869236	0.332138	0.364765	1.02197	0.390363	0.848596	0.431824	0.387839	39.4	0	B	III	Male	54
5	0.630493	0.327918	0.627217	0.64552	0.363334	0.987166	0.479794	0.340915	28.7	0	C	III	Male	55
6	0.744873	0.31791	0.353983	1.01388	0.38791	0.976525	0.483919	0.353263	19	0	A	II	Female	37
7	0.911624	0.492157	0.443865	0.742719	0.564971	1.20369	0.541353	0.471841	20.6	0	B	III	Female	70
8	0.749609	0.313819	0.406587	0.992837	0.370358	0.921614	0.467826	0.323508	23.5	1	A	II	Female	58
9	0.53815	0.32408	0.352047	1.00383	0.365058	0.988281	0.427741	0.352633	36.6	1	A	II	Male	53
10	0.883777	0.325918	0.439781	0.868982	0.423792	1.02155	0.450621	0.357577	10	1	A	II	Male	66
11	0.774012	0.291536	0.577671	0.48475	0.382515	1.06505	0.442408	0.331336	32.8	0	B	III	Male	47
12	0.616339	0.335398	0.627309	1.01969	0.403786	0.941556	0.383995	0.337781	10.4	0	A	I	Male	53
13	0.72067	0.299602	0.619474	0.8653	0.371907	1.00302	0.47808	0.340822	37.2	0	A	I	Male	26
14	0.681843	0.310326	0.515016	0.436678	0.399927	1.0091	0.604413	0.313394	16.3	0	B	III	Male	63
15	0.700822	0.309018	0.471895	0.930479	0.345979	1.06653	0.514458	0.345369	18.6	0	0	I	Male	36
16	0.805091	0.306179	0.354427	0.80865	0.347063	0.969186	0.395632	0.338867	13.8	1	C	III	Male	35
17	0.832824	0.384727	0.51477	0.773892	0.388802	1.05035	0.453276	0.405598	24.9	0	A	III	Male	71
18	0.848345	0.301699	0.42257	0.57424	0.375253	1.14222	0.447987	0.347496	10.4	1	A	I	Male	56
19	0.677716	0.321441	0.502751	0.970381	0.398799	1.10197	0.473731	0.364572	21.5	1	0	II	Male	41
20	0.707806	0.311785	0.487275	0.919267	0.381045	1.01263	0.498357	0.354588	8	1	A	I	Male	52
21	0.832013	0.34567	0.414824	1.08714	0.398855	0.985822	0.487864	0.407821	38.7	0	A	II	Male	43
22	0.804731	0.31253	0.467573	0.855954	0.397985	1.05267	0.44748	0.324521	8.8	1	A	II	Male	55
23	0.688377	0.302169	0.384845	1.02373	0.376833	1.02862	0.485069	0.328481	8.4	1	C	III	Male	49
24	0.681688	0.315898	0.411183	0.930101	0.41008	1.05249	0.501386	0.356402	6.2	1	A	II	Female	53
25	0.80869	0.400694	0.530216	1.07302	0.50474	0.973689	0.623918	0.475364	13.3	1	A	I	Male	45
26	0.684525	0.302015	0.352575	0.983384	0.412589	0.877851	0.478966	0.34959	13.1	1	A	I	Male	34
27	0.706508	0.375373	0.546768	0.939187	0.429968	1.10057	0.412092	0.40412	21.3	1	0	II	Male	48
28	0.663752	0.312205	0.376186	1.08606	0.390365	0.950005	0.423953	0.388571	14.4	0	A	I	Male	41
29	0.815258	0.329761	0.402514	0.569673	0.383888	0.845609	0.470639	0.343518	8	1	0	I	Male	52
30	0.73107	0.324486	0.378961	0.960031	0.367747	1.08478	0.494008	0.374567	9.5	1	A	II	Male	77
31	0.809975	0.361069	0.520224	1.1378	0.418548	1.05847	0.555613	0.423929	35.2	1	A	I	Male	37
32	0.732358	0.325249	0.677367	0.873265	0.391576	1.05679	0.397499	0.360015	28.4	1	A	I	Male	52
