# Supplementary material for: Integrative Analysis Identifies Cell-Type-Specific Genes Within Tumor Microenvironment as Prognostic Indicators in Hepatocellular Carcinoma
Source: Front Oncol. 2022 May 30;12:878923. doi: 10.3389/fonc.2022.878923 (PMC9190278; doi:10.3389/fonc.2022.878923)
Supplement: Supplementary file 5 [file DataSheet_5.xlsx]

## Sheet: Supplementary Table S3
Table S5. The pathways enriched by the highly correlated genes with the features in EGC model
gene	Description	setSize	enrichmentScore	NES	pvalue	p.adjust	qvalues	core_enrichment
B3GAT3	Gap junction trafficking and regulation	32	0.66483	2.2033	1.83781e-06	0.000423914	0.000370318	TUBB3/TUBB2A/TUBB2B/MYO6/DAB2/DNM2/SRC/CLTC/DNM1/ACTG1/AP2M1/CLTA/ACTB/CLTB
B3GAT3	Recycling pathway of L1	34	0.650022	2.16635	2.63226e-06	0.000457656	0.000399795	TUBB3/TUBB2A/TUBB2B/RPS6KA4/AP2S1/AP2A2/RPS6KA1/DNM2/SRC/CLTC/KIF4A/DNM1/ACTG1/AP2M1/CLTA/ACTB
B3GAT3	VLDLR internalisation and degradation	10	0.858971	2.10615	9.01403e-06	0.000975636	0.000852286	NR1H2/AP2S1/AP2A2/MYLIP/CLTC/AP2M1/CLTA
B3GAT3	IRE1alpha activates chaperones	46	0.586156	2.05601	1.34859e-05	0.0012407	0.00108384	HYOU1/CXXC1/YIF1A/ARFGAP1/GSK3A/PPP2R5B/DDX11/DCTN1/TATDN2/ZBTB17/KDELR3/GFPT1/CUL7/SRPRB/GOSR2/ATP6V0D1/EXTL3/LMNA/ERN1/SHC1/PLA2G4B/KLHDC3/TPP1/WFS1/TSPYL2/ADD1/EXTL1
B3GAT3	Glycosphingolipid metabolism	30	0.617026	2.01505	0.000115208	0.00741606	0.00647845	ARSA/HEXA/GLA/CTSA/UGCG/SMPD1/B4GALNT1/ARSF/GLTP/GLB1L/ARSJ/NEU1/NEU2/GBA/PSAP
B3GAT3	DNA Replication Pre-Initiation	73	0.486742	1.85573	0.000203677	0.0110225	0.00962892	PSMD13/MCM7/PSMD9/E2F1/PSMC5/PSMA4/POLA2/PSMD3/CDT1/PSMD2/MCM2/CDC7/POLE/PSMC4/MCM5/PSMD11/MCM10/PSMB3/PSME3/PSMD1/CDC6/PSMA5/PSMD14/PSMD8/RPA4/CDC45/E2F3/MCM6/UBC/DBF4/PSMB5/RPA2/PSMB2
B3GAT3	Sealing of the nuclear envelope (NE) by ESCRT-III	15	0.722156	1.98234	0.000340776	0.0165007	0.0144145	TUBB3/TUBB2A/TUBB2B/CHMP6
B3GAT3	Unfolded Protein Response (UPR)	80	0.45757	1.76746	0.000352808	0.0166453	0.0145408	HYOU1/CXXC1/YIF1A/ARFGAP1/GSK3A/PPP2R5B/EXOSC4/EXOSC5/DDIT3/DDX11/CREB3/DCTN1/TATDN2/ZBTB17/ASNS/KDELR3/CREB3L1/GFPT1/CUL7/SRPRB/GOSR2/ATP6V0D1/ATF4/EXTL3/LMNA/EXOSC7/ERN1/SHC1/PLA2G4B/KLHDC3/TPP1/WFS1/TSPYL2/MBTPS1/ADD1/NFYC/CALR/EXTL1
B3GAT3	N-Glycan biosynthesis	36	0.560869	1.8905	0.000470288	0.0196666	0.0171802	MAN1B1/GANAB/B4GALT2/ALG3/DPM2/ALG12/DDOST/TUSC3/RPN2/MGAT1/B4GALT3/MGAT4B/DPAGT1
B3GAT3	Parkin-Ubiquitin Proteasomal System pathway	56	0.489132	1.77349	0.000663248	0.0259655	0.0226826	PSMD13/TUBB3/TUBB2A/TUBB2B/PSMD9/STUB1/PSMC5/PSMD3/PSMD2/PSMC4/PSMD11/HSPA6/PSMD1/CCNE1/TUBB/PSMD14/PSMD8/HSPA2
B3GAT3	Activation of the pre-replicative complex	24	0.609718	1.87102	0.000778175	0.0296539	0.0259048	MCM7/POLA2/CDT1/MCM2/CDC7/POLE/MCM5/MCM10/CDC6/RPA4/CDC45/MCM6/DBF4/RPA2
B3GAT3	Nuclear Envelope (NE) Reassembly	54	0.489143	1.75951	0.000844736	0.0304767	0.0266236	TUBB3/TUBB2A/KPNB1/TUBB2B/RANGAP1/CHMP6/NUP62/TNPO1/NUP188/EMD/PPP2CA/BANF1/PPP2R1A/NUP85/SIRT2/LMNA/UBE2I/CCNB2/RCC1/NUP107
B3GAT3	COPI-dependent Golgi-to-ER retrograde traffic	66	0.46948	1.74863	0.000955002	0.0325408	0.0284267	KLC2/TUBB3/RAB1B/TUBB2A/ARFGAP1/TUBB2B/STX18/TMED9/KIF2C/ARF3/COPZ1/COPE/KDELR3/KIF4A/KIF3A/ARF5/BNIP1/KIF3C/KIF3B/GBF1/CENPE/NSF/TMED3
B3GAT3	Glycosylation and related congenital defects	17	0.654756	1.85395	0.000989502	0.0331033	0.0289181	ALG3/DPM2/GMPPB/ALG12/MPI/TUSC3/PMM2
B3GAT3	PCP/CE pathway	85	0.433531	1.70415	0.00109477	0.0353399	0.0308718	PSMD13/PSMD9/PSMC5/AP2S1/PSMA4/PSMD3/PSMD2/SCRIB/AP2A2/DVL2/PSMC4/PSMD11/PRKCG/CLTC/PSMB3/FZD6/AP2M1/CLTA/PSME3/PSMD1/CLTB/PSMA5/PSMD14/PSMD8/ARRB2/DVL3/WNT4/PFN1/UBC/DVL1/PSMB5/PSMB2/WNT5B/PSMB8/FZD8/PSMB6/FZD2
B3GAT3	Metabolism of polyamines	55	0.489046	1.76618	0.00131113	0.0411515	0.0359487	PSMD13/PSMD9/NQO1/PSMC5/PSMA4/PSMD3/PSMD2/SRM/OAZ2/PSMC4/PSMD11/OAZ1/OAZ3/PSMB3/PSME3/PSMD1/ODC1/PSMA5/PSMD14/PSMD8
EEF1D	Activation of the mRNA upon binding of the cap-binding complex and eIFs, and subsequent binding to 43S	46	0.804462	3.08522	1e-10	7.36e-09	5.97895e-09	PABPC1/RPS20/RPS6/RPS9/RPS24/RPS21/RPS10/RPS4X/RPS12/RPS23/RPS19/RPS29/RPS28/RPS17/RPS2/RPS15/RPS3/RPS27A/RPS11/RPS3A/EIF4A1/RPS18/RPS7/RPS14/RPS8/EIF4B/RPS25/FAU/RPS13/RPS16/RPS27/RPSA/RPS15A
EEF1D	Cytoplasmic Ribosomal Proteins	87	0.842133	3.62523	1e-10	7.36e-09	5.97895e-09	RPL8/RPS20/RPL7/RPLP2/RPL30/RPL12/RPL36/RPL14/RPL27A/RPS6/RPL35A/RPS9/RPL37A/RPL24/RPL13/RPL36A/RPL31/RPL34/RPL39/RPS24/RPS21/RPL7A/RPL4/RPS10/RPL10A/RPS4X/RPL23/RPL32/RPL35/RPS12/RPL3/RPS23/RPS19/RPS29/RPS28/RPS17/RPS2/RPS15/RPL28/RPL9/RPS3/RPL13A/RPL17/RPL38/RPL18A/RPS27A/RPS11/RPS3A/RPL22/RPS18/RPL37/RPL6/RPL23A/RPL21/RPLP0/RPS7/RPS14/RPS8/RPL27/RPS25/RPL29/RPL19/RPL15/FAU/RPL18/UBA52/RPS13/RP…
EEF1D	Eukaryotic Translation Elongation	91	0.835536	3.61987	1e-10	7.36e-09	5.97895e-09	EEF1D/RPL8/RPS20/RPL7/RPLP2/RPL30/RPL12/RPL36/RPL14/RPL27A/RPS6/RPL35A/RPS9/RPL37A/RPL24/RPL13/RPL36A/RPL31/RPL34/RPL39/RPS24/RPS21/RPL7A/RPL4/RPS10/RPL10A/RPS4X/RPL23/RPL32/RPL35/RPS12/RPL3/RPS23/RPS19/RPS29/RPS28/RPS17/RPS2/RPS15/RPL28/RPL9/RPS3/EEF2/RPL13A/RPL17/RPL38/RPL18A/RPS27A/RPS11/EEF1B2/RPS3A/RPL22/RPS18/RPL37/RPL6/RPL23A/RPL21/RPLP0/EEF1G/RPS7/RPS14/RPS8/RPL27/RPS25/RPL29/RPL19/RPL15/…
EEF1D	Ribosome	84	0.84352	3.59867	1e-10	7.36e-09	5.97895e-09	RPL8/RPS20/RPL7/RPLP2/RPL30/RPL12/RPL36/RPL14/RPL27A/RPS6/RPL35A/RPS9/RPL37A/RPL24/RPL13/RPL36A/RPL31/RPL34/RPL39/RPS24/RPS21/RPL7A/RPL4/RPS10/RPL10A/RPS4X/RPL23/RPL32/RPL35/RPS12/RPL3/RPS23/RPS19/RPS29/RPS28/RPS17/RPS2/RPS15/RPL28/RPL9/RPS3/RPL13A/RPL17/RPL38/RPL18A/RPS27A/RPS11/RPS3A/RPL22/RPS18/RPL37/RPL6/RPL23A/RPL21/RPLP0/RPS7/RPS8/RPL27/MRPL13/RPS25/RPL29/RPL19/RPL15/FAU/RPL18/UBA52/RPS13/R…
EEF1D	rRNA modification in the nucleus and cytosol	35	0.682596	2.43627	2.53101e-07	1.05842e-05	8.59817e-06	RPS6/RPS9/PDCD11/DKC1/WDR43/RPS2/FBL/HEATR1/RPS7/RPS14/WDR3/UTP14A/WDR46/NAT10/NOC4L/UTP20/MPHOSPH10/PWP2/TBL3
EEF1D	TYROBP Causal Network	46	0.559867	2.14717	4.44474e-05	0.000924906	0.000751354	TCIRG1/SLC7A7/RUNX3/RGS1/CAPG/LHFPL2/IL10RA/IGSF6/SPP1/RNASE6/ELF4/GAL3ST4/CYTL1/SLC1A5/CD37/NCKAP1L/TYROBP/IL18/ITGAM/ITGB2/SAMSN1/SFT2D2/LYL1/HCLS1/CREB3L2/BIN2/PLEK/ITGAX/TNFRSF1B
EEF1D	Integrin cell surface interactions	78	0.45295	1.90438	0.000118596	0.00216057	0.00175515	COMP/THBS1/ITGB5/COL10A1/TNC/COL6A3/COL1A2/COL16A1/ITGB8/SPP1/ITGAV/COL5A1/LUM/COL3A1/CD44/JAM2/ITGB6/ITGA4/ITGAM/ITGB2/ICAM1/COL8A2/COL1A1/VCAM1/ICAM4/COL5A2/HSPG2/ITGA2/ITGA5/ITGAX/COL7A1/COL8A1
EEF1D	ECM-receptor interaction	80	0.425664	1.80255	0.000628746	0.00804166	0.0065327	RELN/COMP/THBS1/ITGB5/COL11A1/THBS2/TNC/COL6A3/COL1A2/ITGB8/SPP1/ITGAV/COL5A1/LAMA5/LAMC2/COL3A1/LAMA4/CD44/ITGB6/SDC3/ITGA4/GP6/COL1A1/SDC4/COL5A2/LAMB1/HSPG2/ITGA2/ITGA5/SV2A/ITGB4/LAMB2/COL6A2
EEF1D	Surfactant metabolism	24	0.594567	1.91667	0.00107304	0.012231	0.0099359	TTF1/ADORA2B/CKAP4/LMCD1/ADRA2C/ADORA2A/SFTPD/CSF2RA/ABCA3/CSF2RB/SFTPA2/SFTPB
EEF1D	RNA Polymerase II Transcription Termination	42	0.501582	1.87346	0.00110325	0.0124538	0.0101169	CPSF1/THOC5/FIP1L1/NCBP2/THOC2/RNPS1/THOC1/ZC3H11A/SNRPE/SNRPD3/CASC3/CPSF4/SYMPK/U2AF1/SNRPG/SNRPF/CSTF3
EEF1D	Translation Factors	37	0.527412	1.8975	0.00122184	0.0133029	0.0108067	EEF1D/PABPC1/EEF2/EIF5B/EEF1B2/EIF4A1/EEF1G/EIF4B/EIF2B5/EEF1A1/EIF2AK2/GSPT2
EEF1D	Transport of Mature Transcript to Cytoplasm	56	0.46656	1.85621	0.00124098	0.0134318	0.0109114	CPSF1/NXT1/THOC5/FIP1L1/NCBP2/NUP214/THOC2/RNPS1/THOC1/ZC3H11A/NUP43/CASC3/RAE1/CPSF4/SYMPK/U2AF1/NUP93/NUP210/NUP62/NUP88/U2AF2/NUP54/NXF1/TPR/SEH1L
EEF1D	RNA Polymerase I Transcription Initiation	38	0.530698	1.91084	0.00137435	0.0145334	0.0118063	POLR2H/GTF2H3/POLR1B/TTF1/GATAD2A/POLR1E/MBD3/GTF2H2/CHD3/HDAC2/CDK7/CHD4/TBP/TAF1C/POLR2K/TAF1B/MNAT1/MTA2/MTA1
EEF1D	Amplification and Expansion of Oncogenic Pathways as Metastatic Traits	16	0.656464	1.89778	0.00166769	0.0169533	0.0137721	POSTN/TNC/NOTCH1/LEF1/JAG1/TCF7/CXCR4/TCF7L2/VHL/PIK3CG/VCAM1
EEF1D	Collagen degradation	56	0.460049	1.8303	0.00178159	0.0177196	0.0143947	MMP12/MMP9/COL11A1/COL10A1/MMP2/COL6A3/COL1A2/COL16A1/ADAM17/COL5A1/MMP11/MMP7/ADAM9/COL3A1/COL14A1/COL8A2/COL1A1/MMP3/COL5A2/COL19A1/COL7A1/COL8A1
EEF1D	tRNA modification in the nucleus and cytosol	24	0.577262	1.86088	0.00181162	0.0178066	0.0144653	TRMT12/TRMT1/PUS1/WDR4/METTL1/PUS7/THG1L/THADA
EEF1D	RNA Polymerase I Transcription Termination	25	0.567246	1.84712	0.00226444	0.0210433	0.0170946	POLR2H/GTF2H3/POLR1B/TTF1/POLR1E/GTF2H2/CDK7/TBP/TAF1C/POLR2K/TAF1B/MNAT1
EEF1D	ECM proteoglycans	70	0.420112	1.74286	0.00237817	0.0217703	0.0176852	COMP/ITGB5/BGN/TNC/COL6A3/COL1A2/TGFB1/ITGAV/COL5A1/LAMA5/LUM/ASPN/HAPLN1/COL3A1/LAMA4/ITGB6/COL1A1/COL5A2/LAMB1/HSPG2/ITGA2/ITGAX/TGFB2/DSPP/LAMB2/COL6A2/DCN/COL9A2/TNN/APP/LAMC1/TNXB
EEF1D	Hippo-Yap signaling pathway	21	0.589727	1.84088	0.00263967	0.0234403	0.0190419	STK3/NDRG1/MAP4K4/TEAD4/MINK1/RASSF1/YY1AP1/TAZ
EEF1D	Repression of WNT target genes	12	0.694029	1.85442	0.00334541	0.0282365	0.0229381	MYC/CTBP2/TLE3/LEF1/TCF7/TCF7L2
EEF1D	snRNP Assembly	45	0.460866	1.75431	0.00347639	0.0289437	0.0235126	TGS1/CLNS1A/NCBP2/NUP214/GEMIN4/SMN1/SMN2/NUP43/SNRPE/SNRPD3/RAE1/SNRPD1/SNRPG/SNRPF/NUP93/NUP210/NUP62/NUP88/NUP54/TPR/SEH1L
EEF1D	Processing of Capped Intronless Pre-mRNA	23	0.574615	1.85004	0.00358078	0.0296785	0.0241096	CPSF1/FIP1L1/NCBP2/SNRPE/SNRPD3/CPSF4/SYMPK/SNRPG/SNRPF/CSTF3
EEF1D	Nucleobase biosynthesis	13	0.689424	1.89465	0.00365482	0.0301564	0.0244977	IMPDH2/PFAS/PPAT/ATIC/GMPS/IMPDH1/UMPS/ADSL
EEF1D	Purine ribonucleoside monophosphate biosynthesis	10	0.707594	1.81846	0.00553695	0.0419259	0.0340588	IMPDH2/PFAS/PPAT/ATIC/GMPS/IMPDH1/ADSL
EEF1D	Endochondral Ossification	58	0.427672	1.70261	0.0060931	0.0453899	0.0368728	FGFR1/SCIN/MMP9/COL10A1/SOX9/RUNX3/TGFB1/SPP1/PLAT/PLAU/IGF2/CHST11/FGFR3/CDKN1C/IGF1R/PTHLH/SERPINH1/MGP/ADAMTS5/BMPR1A
EEF1D	Endochondral Ossification with Skeletal Dysplasias	58	0.427672	1.70261	0.0060931	0.0453899	0.0368728	FGFR1/SCIN/MMP9/COL10A1/SOX9/RUNX3/TGFB1/SPP1/PLAT/PLAU/IGF2/CHST11/FGFR3/CDKN1C/IGF1R/PTHLH/SERPINH1/MGP/ADAMTS5/BMPR1A
NRP1	Integrin cell surface interactions	78	0.557344	2.47672	1.94483e-09	7.15697e-07	4.8027e-07	COL6A3/COL1A2/COL3A1/ITGAV/COL4A1/COL16A1/SPP1/COL4A2/ITGB2/ITGB1/TNC/LUM/COL5A1/FBN1/COL1A1/ITGA6/COL5A2/THBS1/COL6A2/ITGB5/CD44/JAM3/ICAM1/HSPG2/PECAM1/ITGAM/COL10A1/ITGA2/ITGA4/VCAM1/ITGAE/COL9A2/COL8A2/CD47/COMP/COL7A1
NRP1	TYROBP Causal Network	46	0.651277	2.63327	3.71037e-09	1.11775e-06	7.50067e-07	SLC7A7/TYROBP/SPP1/ITGB2/RNASE6/LHFPL2/HCLS1/RGS1/MAF/IL10RA/ZFP36L2/PYCARD/NCKAP1L/PLEK/SAMSN1/CAPG/IGSF6/ELF4/NPC2/ITGAM
NRP1	RAC3 GTPase cycle	71	0.558825	2.47575	4.2523e-09	1.11775e-06	7.50067e-07	JAG1/ARHGDIB/MCAM/ITGB1/ABI1/VRK2/CYBB/ARHGAP15/NCKAP1L/SWAP70/ABR/CYFIP1/ARHGAP17/AMIGO2/DOCK10/NCF4/CYBA/VAMP3/CAV1/LBR/TRIO/RACGAP1/WASF1/SLC1A5/NCF2/ARHGAP26/ARHGAP1/EPHA2/PAK2/DSG2
NRP1	Collagen formation	68	0.571018	2.50914	9.97078e-09	2.29328e-06	1.53891e-06	COL6A3/PXDN/COL1A2/COL3A1/SERPINH1/COL4A1/COL16A1/COL4A2/COL5A1/COL1A1/ITGA6/COL5A2/MMP7/COL11A1/COL6A2/LOXL2/LOXL1/COL15A1/CRTAP/COL10A1/LOX/P4HA2/MMP9/COL9A2/CTSS/COL8A2/PLOD2/COL14A1/COL7A1/DST
NRP1	miRNA targets in ECM and membrane receptors	20	0.80046	2.58433	1.36264e-08	2.78583e-06	1.86944e-06	COL6A3/COL1A2/COL3A1/COL4A1/COL4A2/LAMC1/THBS2/COL5A1/COL5A2/THBS1/COL6A2/ITGB5/LAMB2/LAMA4
NRP1	RAC2 GTPase cycle	69	0.543038	2.39285	2.53073e-08	3.95088e-06	2.65125e-06	IQGAP1/MCAM/ITGB1/ABI1/VRK2/CYBB/NCKAP1L/SWAP70/DOCK2/ABR/CYFIP1/DOCK1/ARHGAP17/DOCK10/NCF4/CYBA/VAMP3/CAV1/LBR/TRIO/RACGAP1/PIK3CA/NCF2/VAV1/ARHGAP26/ARHGAP1/EPHA2/PAK2/DSG2/RAC2/NCKAP1/VAV3
NRP1	ECM proteoglycans	70	0.544393	2.40357	2.54623e-08	3.95088e-06	2.65125e-06	LAMB1/COL6A3/COL1A2/SPARC/COL3A1/ITGAV/COL4A1/COL4A2/LAMC1/ITGB1/TNC/LUM/ASPN/COL5A1/COL1A1/COL5A2/LAMA5/BGN/DCN/COL6A2/ITGB5/HSPG2/ITGA2/LAMA2/LAMB2/LAMA4/COL9A2/COMP/SERPINE1/TGFB3/LAMA3/TGFB1/MATN3
NRP1	Pathogenic Escherichia coli infection	45	0.63582	2.55321	3.23509e-08	3.95088e-06	2.65125e-06	TUBB6/ARPC2/HCLS1/YWHAZ/ITGB1/YWHAQ/LY96/ARPC3/NCK2/ARHGEF2/ARPC1B/ARPC1A/RHOA/TUBB/ARPC5L/ARPC5/NCL/ACTB/TLR4/NCK1
NRP1	Assembly of collagen fibrils and other multimeric structures	52	0.596578	2.47411	3.49411e-08	3.95088e-06	2.65125e-06	COL6A3/PXDN/COL1A2/COL3A1/COL4A1/COL4A2/COL5A1/COL1A1/ITGA6/COL5A2/MMP7/COL11A1/COL6A2/LOXL2/LOXL1/COL15A1/COL10A1/LOX/MMP9/COL9A2/CTSS/COL8A2/COL14A1/COL7A1/DST/LAMA3
NRP1	ECM-receptor interaction	80	0.53302	2.37798	5.01997e-08	5.13153e-06	3.44353e-06	LAMB1/COL6A3/COL1A2/COL3A1/ITGAV/COL4A1/SPP1/COL4A2/LAMC1/THBS2/ITGB1/TNC/COL5A1/COL1A1/ITGA6/COL5A2/LAMA5/THBS1/CD36/COL11A1/COL6A2/ITGB5/CD44/RELN/HSPG2/SDC3/ITGA2/ITGA4/LAMA2/LAMB2/LAMA4/CD47/COMP
NRP1	Non-integrin membrane-ECM interactions	57	0.575698	2.4503	7.15951e-08	6.58675e-06	4.42005e-06	LAMB1/COL1A2/COL3A1/ITGAV/COL4A1/COL4A2/LAMC1/ACTN1/ITGB1/TNC/COL5A1/COL1A1/ITGA6/COL5A2/LAMA5/THBS1/COL11A1/ITGB5/TRAPPC4/HSPG2/SDC3/COL10A1/ITGA2/LAMA2/LAMB2/LAMA4
NRP1	Transcriptional regulation by RUNX3	86	0.500612	2.28015	8.05537e-08	7.05804e-06	4.73631e-06	JAG1/SPP1/TCF7L2/WWTR1/SMURF2/CBFB/NOTCH1/SNW1/MYC/RPS27A/PSMD6/ITGA4/HES1/HDAC4/SMAD3/YAP1/PSMC4/PSMB5/TEAD4/KRAS/PSMD14/EP300/PSMD10/PSMC2/TGFB1/PSMA7/LEF1/PSMC6/PSMB10/PSMB9/UBC/PSMA3/TP53/PSMD1/RUNX3/PSMD7/PSME3/PSMA1/CDKN2A/MAML1
NRP1	Collagen degradation	56	0.563067	2.37813	4.77266e-07	3.51435e-05	2.35832e-05	COL6A3/ADAM9/COL1A2/COL3A1/COL4A1/COL16A1/COL4A2/COL5A1/COL1A1/MMP2/COL5A2/MMP7/ADAM10/CTSK/COL11A1/COL6A2/MMP12/COL15A1/COL10A1/MMP1/MMP9/COL9A2/COL8A2/COL14A1/COL7A1
NRP1	Collagen biosynthesis and modifying enzymes	49	0.579793	2.35806	4.77494e-07	3.51435e-05	2.35832e-05	COL6A3/COL1A2/COL3A1/SERPINH1/COL4A1/COL16A1/COL4A2/COL5A1/COL1A1/COL5A2/COL11A1/COL6A2/COL15A1/CRTAP/COL10A1/P4HA2/COL9A2/COL8A2/PLOD2/COL14A1/COL7A1
NRP1	Microglia Pathogen Phagocytosis Pathway	38	0.619218	2.38743	9.03942e-07	5.94019e-05	3.98618e-05	TYROBP/ITGB2/C1QB/FCER1G/HCK/LYN/CYBB/RAC1/C1QA/NCKAP1L/PIK3CD/ARPC1B/NCF4/CYBA/FCGR1A/ITGAM/PIK3CA/NCF2/PTPN6/VAV1/SYK/TREM1/RAC2/VAV3
NRP1	Signaling by MET	74	0.492361	2.17727	1.25905e-06	7.72219e-05	5.182e-05	LAMB1/COL1A2/COL3A1/TNS3/LAMC1/RAP1B/ITGB1/COL5A1/COL1A1/COL5A2/LAMA5/RAC1/COL11A1/SHC1/STAM/EPS15/RPS27A/SOS1/STAM2/ITGA2/STAT3/LAMA2/LAMB2/LAMA4/KRAS/HGF/PIK3CA
NRP1	Syndecan interactions	27	0.679833	2.41282	1.44976e-06	8.55431e-05	5.7404e-05	COL1A2/COL3A1/ITGAV/ACTN1/ITGB1/TNC/COL5A1/COL1A1/ITGA6/COL5A2/THBS1/ITGB5/TRAPPC4/SDC3/ITGA2
NRP1	Collagen chain trimerization	33	0.63787	2.36468	1.73013e-06	9.4937e-05	6.37077e-05	COL6A3/COL1A2/COL3A1/COL4A1/COL16A1/COL4A2/COL5A1/COL1A1/COL5A2/COL11A1/COL6A2/COL15A1/COL10A1/COL9A2/COL8A2/COL14A1/COL7A1
NRP1	Signaling by PDGF	55	0.548718	2.30157	1.80587e-06	9.4937e-05	6.37077e-05	PDGFC/COL6A3/PTPN12/COL3A1/COL4A1/SPP1/COL4A2/THBS2/PLAT/COL5A1/PDGFRA/COL5A2/THBS1/NCK2/COL6A2/PDGFD/SOS1/STAT3/NCK1/COL9A2/KRAS/PIK3CA/PDGFRB/THBS4/STAT1/COL4A5/GRB2/STAT5B/STAT6/PIK3CB/RASA1/STAT5A/CRKL/PTPN11
NRP1	MET promotes cell motility	38	0.60508	2.33292	2.16286e-06	0.000110546	7.41823e-05	LAMB1/COL1A2/COL3A1/TNS3/LAMC1/RAP1B/ITGB1/COL5A1/COL1A1/COL5A2/LAMA5/RAC1/COL11A1/ITGA2/LAMA2/LAMB2/LAMA4/HGF/PTK2/LAMA3/RAP1A
NRP1	RHO GTPases Activate WASPs and WAVEs	33	0.628146	2.32863	3.10049e-06	0.000146279	9.81612e-05	ARPC2/ACTR3/ABI1/RAC1/ARPC3/WIPF1/NCKAP1L/MAPK1/CYFIP1/ARPC1B/ARPC1A/ARPC5/ACTR2/ACTB/NCK1/WASF1/PTK2
NRP1	MET activates PTK2 signaling	28	0.643748	2.29084	4.45261e-06	0.000199122	0.000133622	LAMB1/COL1A2/COL3A1/LAMC1/ITGB1/COL5A1/COL1A1/COL5A2/LAMA5/COL11A1/ITGA2/LAMA2/LAMB2/LAMA4/HGF/PTK2/LAMA3
NRP1	Signaling by NOTCH4	73	0.471099	2.08511	7.96782e-06	0.000325795	0.000218626	JAG1/YWHAZ/RBX1/NOTCH2/ADAM10/ACTA2/NOTCH1/SNW1/RPS27A/PSMD6/HES1/SMAD3/PSMC4/PSMB5/PSMD14/EP300/NOTCH4/TACC3/PSMD10/PSMC2/PSMA7/PSMC6/PSMB10/PSMB9/UBC/PSMA3/PSMD1/PSMD7/PSME3/PSMA1/MAML1/CUL1/PSMB7/PSMD4/UBA52/PSEN1/PSMB8/PSMD3/PSMC1/PSMD5/PSMB4/HEY1/PSMA6/PSME2/PSMD2
NRP1	miR-509-3p alteration of YAP1/ECM axis	15	0.755711	2.27192	2.00594e-05	0.000723713	0.00048565	SPARC/COL3A1/THBS2/COL5A1/COL1A1/EDNRA/TWIST1/YAP1/TEAD4
NRP1	Laminin interactions	29	0.627389	2.22958	2.27926e-05	0.000806508	0.000541209	LAMB1/NID2/ITGAV/COL4A1/COL4A2/LAMC1/ITGB1/ITGA6/LAMA5/HSPG2/ITGA2/LAMA2/LAMB2/LAMA4/COL7A1/LAMA3/NID1/COL4A5/LAMC3
NRP1	SARS-CoV-2 Innate Immunity Evasion and Cell-specific immune response	60	0.474225	2.04203	3.55005e-05	0.00114598	0.000769014	TRAF5/CCL2/HDAC2/JAK1/IFITM1/CXCL1/CXCL12/DDX58/CXCL2/CASP8/CCL3/SMAD3/TFAP2A/IFNAR2/CCL4/EP300/CXCL6/TP53I3/TANK/CXCL3/MX1/TGFB1/FADD/STAT1/IL6/TRAF3/CXCL5/TBK1/CXCL9/PPBP
NRP1	RHOD GTPase cycle	37	0.54684	2.08915	3.77055e-05	0.0011759	0.000789092	ARHGAP12/MCAM/ACTN1/VRK2/AKAP12/ARHGAP17/VAMP3/CAV1/LBR/DBN1/ADD3/RACGAP1/SLC4A7/EFHD2/MOSPD2/ARHGAP26/ARHGAP1/CAPZB
NRP1	Oncostatin M Signaling Pathway	61	0.480628	2.08084	4.42087e-05	0.00129117	0.000866445	HIF1A/CCL2/FOS/JAK1/MAPK1/SHC1/OSMR/JUNB/PRKCH/CASP7/CREB1/RPS6/SOS1/JAK2/STAT3/MMP1/KRAS/VEGFA/EGR1/SERPINE1/MAPK9
NRP1	Hypothesized Pathways in Pathogenesis of Cardiovascular Disease	23	0.651309	2.22299	4.82248e-05	0.00138646	0.000930389	TGFBR2/POSTN/LTBP2/LTBP1/FBN1/FLNA/MAPK1/SHC1/SMAD2/SMAD3/AGTR1/SERPINE1
NRP1	RHOBTB GTPase Cycle	30	0.586409	2.09148	9.51943e-05	0.00240505	0.00161392	VIM/RHOBTB1/ACTN1/PHIP/RBMX/DBN1/CCT6A/ROCK1/MYO6/HSP90AA1/ROCK2/TWF1/COPS4/STK38/HSP90AB1/RNF20/CUL3/ACTG1/RBBP6/CCT7/CCT2
NRP1	Amplification and Expansion of Oncogenic Pathways as Metastatic Traits	16	0.713466	2.17336	9.70975e-05	0.00240505	0.00161392	JAG1/CXCR4/POSTN/TCF7L2/TNC/NOTCH1/VCAM1/VEGFA
NRP1	Interleukin-10 signaling	45	0.517711	2.07893	9.95129e-05	0.00240926	0.00161674	IL1R1/CCL2/IL10RA/CCR1/JAK1/CXCL1/TIMP1/ICAM1/CXCL2/STAT3/CCL3/CCL3L1/CCL3L3/IL10RB/CCL19/TNFRSF1A/CCL4/PTGS2
NRP1	Endochondral Ossification	58	0.466983	1.99075	0.000121799	0.00280138	0.00187987	FRZB/SERPINH1/SPP1/MEF2C/MGP/PLAT/ADAMTS1/SLC38A2/CAB39/ADAMTS5/FGFR1/COL10A1/SOX9/HDAC4/PTCH1/PTHLH/MMP9/VEGFA/CALM1/PLAU/CHST11/DDR2/BMPR1A/CDKN1C/TGFB1/TIMP3/STAT1/FGF2/CALM2/STAT5B/TGFB2
NRP1	Endochondral Ossification with Skeletal Dysplasias	58	0.466983	1.99075	0.000121799	0.00280138	0.00187987	FRZB/SERPINH1/SPP1/MEF2C/MGP/PLAT/ADAMTS1/SLC38A2/CAB39/ADAMTS5/FGFR1/COL10A1/SOX9/HDAC4/PTCH1/PTHLH/MMP9/VEGFA/CALM1/PLAU/CHST11/DDR2/BMPR1A/CDKN1C/TGFB1/TIMP3/STAT1/FGF2/CALM2/STAT5B/TGFB2
NRP1	Semaphorin interactions	59	0.46012	1.97078	0.000126098	0.002823	0.00189438	NRP1/TYROBP/ITGB1/MYL9/DPYSL2/RAC1/LIMK2/DPYSL3/PTPRC/MYH11/RHOA/PLXND1/PLXNB3/SEMA4D/MYH9/RRAS/PLXNA1/RHOC/ROCK1/HSP90AA1/TLN1/PAK2/ROCK2/RHOB
NRP1	Cell-extracellular matrix interactions	16	0.708799	2.15914	0.000128876	0.002823	0.00189438	LIMS1/ACTN1/RSU1/ITGB1/FLNA/ARHGEF6/PARVA/VASP/ACTB/PARVB/FLNC
NRP1	Crosslinking of collagen fibrils	16	0.709719	2.16194	0.000128876	0.002823	0.00189438	PXDN/COL1A2/COL4A1/COL4A2/COL1A1/LOXL2/LOXL1/LOX
NRP1	Interferon gamma signaling	84	0.416482	1.87325	0.000136119	0.00294658	0.00197731	IFNGR2/HLA-DPA1/HLA-DRB3/HLA-DRB1/IFNGR1/HLA-DPB1/HLA-DRA/HLA-DQA1/JAK1/HLA-DQB1/HLA-DQA2/TRIM8/FCGR1B/CD44/HLA-DRB5/ICAM1/FCGR1A/TRIM22/JAK2/VCAM1/B2M/OAS3/HLA-B/HLA-E/TRIM38/MID1/SUMO1/PTPN6/HLA-F/IFI30/SP100/HLA-C/STAT1
NRP1	Translocation of SLC2A4 (GLUT4) to the plasma membrane	53	0.480813	2.00681	0.000140308	0.00300193	0.00201446	TUBB6/YWHAZ/YWHAH/EXOC1/YWHAQ/RAC1/RHOQ/RAB11A/SFN/RAB13/ACTB/MYH9/CALM1/EXOC5/RALA/EXOC4/RAB8A/YWHAB/TBC1D4
NRP1	COPI-independent Golgi-to-ER retrograde traffic	39	0.53339	2.0654	0.000143154	0.00302762	0.00203169	TUBB6/DYNC1I2/DYNC1H1/ACTR1A/BICD1/CAPZA2/GALNT1/DYNC1LI1/DCTN6/RAB3GAP1/CAPZB/PAFAH1B3/ACTR10/PAFAH1B1/DYNC1LI2/DCTN2/CAPZA1/BICD2/TUBB2B/DCTN3/DYNC1I1/GALNT2/DYNLL1/TUBB3/RAB6A
NRP1	Allograft Rejection	82	0.42048	1.87281	0.000167244	0.00338164	0.00226926	VIM/HLA-DPA1/HLA-DRB1/HLA-DPB1/HLA-DMA/C1QB/HLA-DRA/COL5A1/HLA-DMB/PDGFRA/HLA-DQA1/C1QA/HLA-DQB1/HLA-DQA2/CXCL12/HLA-DRB5/CASP7/CASP8/CCL19/C7/VEGFA/AGTR1/HLA-B/FAS/HLA-E/HLA-F/CD55/CCL21/TGFB1/HLA-C/CD86/STAT1/GABPA
NRP1	Fc gamma R-mediated phagocytosis	82	0.420459	1.87272	0.000167244	0.00338164	0.00226926	ARPC2/FCGR2A/GSN/HCK/MARCKSL1/LYN/RAC1/LIMK2/ARPC3/DOCK2/INPP5D/MAPK1/PTPRC/PIK3CD/MARCKS/ARPC1B/ARPC1A/VASP/ARPC5L/ARPC5/FCGR1A/DNM1L/MYO10/SPHK1/DNM1
NRP1	Hepatitis C and Hepatocellular Carcinoma	44	0.501178	1.99741	0.000176292	0.00345083	0.00231569	HIF1A/FRZB/COL4A2/RAC1/JAK1/PODXL/CD44/CASP7/MYC/SOS1/STAT3/SMAD3/MMP1/PTGS2/VEGFA/BCL2L1/BIRC3/TGFB1/LEF1/IL6
NRP1	Regulation of PLK1 Activity at G2/M Transition	62	0.452887	1.96506	0.000183383	0.00352074	0.0023626	DYNC1I2/MAPRE1/DYNC1H1/ACTR1A/PPP1R12A/CLASP1/TUBB/RPS27A/CSNK1E/PPP1CB/OPTN/CKAP5/NEK2/CETN2/CEP135/HSP90AA1/RAB8A/PAFAH1B1/DCTN2/FBXW11/OFD1/UBC/CCNB1/CEP192/PLK1/BTRC/PPP1R12B/DCTN3/PPP2R1A/CUL1/CEP57/UBA52/DYNLL1/CSNK1D/CCNB2/CEP290
NRP1	Primary Focal Segmental Glomerulosclerosis FSGS	67	0.445555	1.95184	0.000183691	0.00352074	0.0023626	JAG1/VIM/LIMS1/ITGAV/ITGB1/YWHAQ/VCL/LAMA5/NOTCH1/CD2AP/PODXL/PARVA/PLAUR/SMARCAL1/TLR4/DNM1/MYH9/NCK1/LAMB2/MKI67/PTK2/PLCE1/PCNA/CDKN1C/TLN1/TGFB1
NRP1	CLEC7A (Dectin-1) signaling	90	0.399826	1.8307	0.000200009	0.00371733	0.00249452	ITPR1/UBE2D1/PYCARD/CLEC7A/IKBKB/PPP3CB/RPS27A/PSMD6/CASP8/CHUK/PSMC4/MALT1/PSMB5/ITPR3/PSMD14/CALM1/UBE2V1/CARD9/PSMD10/PSMC2/SYK/PSMA7/PSMC6/FBXW11/PSMB10/PSMB9/UBC/UBE2N/IL1B/BCL10/PSMA3/PSMD1/PSMD7/PSME3/BTRC/PSMA1/MAP3K7/CUL1/PSMB7/PSMD4
NRP1	Fibrin Complement Receptor 3 Signaling Pathway	36	0.533377	2.01678	0.000229764	0.00406505	0.00272786	TYROBP/ITGB2/CCL2/PLAT/LY96/RHOA/IKBKB/CBLB/ITGAM/CHUK/TLR4/PIK3CA/MYD88/CXCL3/IRAK4/SYK/IL6
NRP1	Elastic fibre formation	40	0.500928	1.95739	0.00024988	0.00433754	0.00291072	ITGAV/LTBP2/ITGB1/FBLN1/LTBP1/MFAP2/FBN1/EFEMP1/ITGB5/BMP4/LOXL2/LOXL1/EFEMP2/FBLN5/LOX
NRP1	Parkin-Ubiquitin Proteasomal System pathway	56	0.464247	1.96076	0.000278042	0.00465089	0.00312099	TUBB6/HSPA2/SIAH1/TUBB/CASP1/PSMD6/CASP8/PSMC4/PSMD14/HSPA14/PSMD10/PSMC2/UBE2G1/PSMC6/SNCAIP/UBE2J1/HSPA8/UBE2L3/HSPA6/PSMD1/PSMD7/TUBB2B/CASK/UBE2L6/CUL1/PSMD4/UBE2G2/TUBB3/PSMD3/PSMC1
NRP1	TGF-beta Receptor Signalling in Skeletal Dysplasias	53	0.46609	1.94536	0.000322609	0.00516243	0.00346426	TGFBR2/BAMBI/SPP1/LTBP1/FBN1/THBS1/FOS/JAK1/BMP4/SMAD2/INHBA/STAT3/SMAD3/EP300/SERPINE1/MAPK9/TGFB1/LEFTY1/FKBP1A/LEF1/STAT1
NRP1	H19 action Rb-E2F1 signaling and CDK-Beta-catenin activity	12	0.737045	2.06955	0.000333756	0.00529406	0.0035526	JAG1/SOX4/TULP3/CDK4
NRP1	TGF-beta signaling pathway	78	0.412422	1.83272	0.000376677	0.00592381	0.00397519	TGFBR2/THBS2/LTBP1/RBX1/SMURF2/THBS1/ACVR1/DCN/MAPK1/ID3/RHOA/BMP4/ID1/BMPR2/SMAD2/MYC/ACVR2A/INHBA/SMAD3/ID4/EP300/COMP/TGFB3/E2F5/ROCK1/BMPR1A/TGFB1/RPS6KB1/LEFTY1/ROCK2/THBS4/ZFYVE16/SMAD6/SP1/TGFB2
NRP1	The role of GTSE1 in G2/M progression after G2 checkpoint	64	0.444015	1.93858	0.000386351	0.00602445	0.00404272	TUBB6/MAPRE1/RPS27A/PSMD6/PSMC4/PSMB5/PSMD14/HSP90AA1/PSMD10/PSMC2/PSMA7/PSMC6/GTSE1/PSMB10/PSMB9/UBC/CCNB1/PSMA3/TP53/PSMD1/PLK1/HSP90AB1/PSMD7/PSME3/PSMA1/TUBB2B/PSMB7/PSMD4/UBA52/TUBB3/PSMB8/PSMD3/CCNB2/PSMC1/PSMD5/PSMB4/PSMA6/PSME2/PSMD2/PSMA4/CDKN1A/PSME4
NRP1	Apoptosis-related network due to altered Notch3 in ovarian cancer	51	0.465042	1.90896	0.000486748	0.00670634	0.00450031	VIM/ANXA5/IER3/THBS1/TNFRSF21/MAPK1/HSPB1/F2R/CTNNA1/CASP7/NET1/BCL3/HDAC1/CUL5/RIPK2/PTK2/SERBP1/RPS6KB1/PAK2/VAV3/HSPD1/SMAD7/IL7R/NQO1/TRAF1/HELLS/CUL1
NRP1	RHOC GTPase cycle	54	0.444843	1.86321	0.000510348	0.00695155	0.00466486	IQGAP1/MCAM/SLK/STOM/ABR/FLOT1/RHOA/STARD13/VAMP3/CAV1/LBR/ARHGEF17/ARHGEF10/RACGAP1/STK10/FMNL2/RHOC/ROCK1/ARHGAP26/ARHGAP1/ROCK2/DAAM1
NRP1	IL1 and megakaryocytes in obesity	24	0.589983	2.02676	0.000525237	0.00700316	0.00469949	IL1R1/CCL2/TIMP2/F2R/TIMP1/TLR1/ICAM1/MMP9/PIK3CA/MYD88/HBEGF/TLR2/PLA2G7/IL1B/S100A9
NRP1	TGF-beta Receptor Signaling	50	0.455385	1.85177	0.000543038	0.00703654	0.00472189	TGFBR2/BAMBI/SPP1/LTBP1/THBS1/FOS/JAK1/BMP4/SMAD2/INHBA/STAT3/SMAD3/EP300/SERPINE1/MAPK9/TGFB1/LEFTY1/FKBP1A/LEF1/STAT1
NRP1	Signal transduction by L1	21	0.613104	2.02698	0.000551023	0.00709009	0.00475782	NRP1/ITGAV/ITGB1/RAC1/MAPK1/FGFR1
NRP1	Smooth Muscle Contraction	31	0.540939	1.94825	0.000567803	0.00720523	0.00483509	ANXA1/TPM4/TPM2/ANXA2/MYL9/VCL/ACTA2/MYH11/ITGB5/TPM1/ACTG2/SORBS1/CALD1/CALM1/LMOD1/MYLK/TLN1/PAK2
NRP1	AGE/RAGE pathway	60	0.421949	1.81693	0.000743522	0.00906014	0.00607983	HIF1A/MSN/MMP2/MMP7/RAC1/MAPK1/SHC1/RHOA/IKBKB/SMAD2/CASP8/JAK2/STAT3/SMAD3/CHUK/MMP9/LGALS3/MAPK9/MYD88/ROCK1/IRAK4
NRP1	T-Cell antigen Receptor (TCR) Signaling Pathway	86	0.382666	1.74294	0.000777108	0.00926909	0.00622005	VIM/MAP3K8/ITPR1/LCP2/FOS/IL15RA/CD83/MAPK1/SHC1/IKBKB/CREB1/CBLB/SOS1/CD3D/CHUK/MALT1/NCK1/RIPK2/FAS/MAPK9/CD3G/VAV1/TGFB1/SH2B3/IL6/VAV3/ITK/IL1B/BCL10/GRB2/CCR5/CRKL/PTPN11/GAB2/FYN/MAP3K7
NRP1	Canonical and Non-Canonical TGF-B signaling	16	0.663476	2.02108	0.000788344	0.00926909	0.00622005	TGFBR2/LOXL2/LOXL1/BMPR2/SMAD2/LOX/SMAD3/GREM1/MAPK9/BMPR1A/TGFB1
NRP1	Interleukin-37 signaling	16	0.663804	2.02207	0.000788344	0.00926909	0.00622005	PTPN12/CASP1/STAT3/SMAD3/PTPN14/PTPN6/TBK1/PTPN9/PTPN4/PTPN11
NRP1	RHOU GTPase cycle	30	0.541402	1.93096	0.000791859	0.00926909	0.00622005	IQGAP1/DLG5/NCK2/ARHGEF6/STAM/STAM2/SPTBN1/NCK1/DST/MYO6/EPHA2/PAK2
NRP1	HSP90 chaperone cycle for steroid hormone receptors (SHR)	44	0.468095	1.86556	0.000935568	0.0104966	0.00704378	TUBB6/DYNC1I2/DYNC1H1/HSPA2/ACTR1A/CAPZA2/DYNC1LI1/DCTN6/HSP90AA1/CAPZB/ACTR10/DYNC1LI2/DCTN2/HSPA8/CAPZA1/HSP90AB1/TUBB2B/DNAJA2/DCTN3/FKBP4/FKBP5/DYNC1I1/DYNLL1/TUBB3/DNAJB1/PTGES3
NRP1	Chaperones modulate interferon Signaling Pathway	19	0.622555	1.98747	0.00108152	0.011685	0.00784128	TAX1BP3/IFNGR2/IFNGR1/IKBKB/JAK2/TNFRSF1A
NRP1	Viral Acute Myocarditis	83	0.371579	1.66295	0.00108595	0.011685	0.00784128	CXCR4/ITGB2/HLA-DMA/AIF1/PYCARD/JAK1/MAPK1/CASP7/CREB1/CAV1/CASP1/SOS1/CASP8/STAT3/ACTB/TLR4/LAMA2/MMP9/PABPC1/BCL2L1/CD55/TGFB1/STAT1/IL6/RAC2/ILK/BNIP2/CCR5/RASA1/EDN1/SGCG/TLR5/FYN
NRP1	Prostaglandin Synthesis and Regulation	42	0.47473	1.88004	0.00110712	0.0118436	0.0079477	ANXA1/ANXA2/PTGER4/ANXA5/S100A6/ANXA4/PTGS1/PTGIS/EDNRA/SOX9/AKR1B1/PTGS2/PTGDS
NRP1	Costimulation by the CD28 family	63	0.426689	1.85082	0.00111872	0.0118986	0.00798455	MAP3K8/HLA-DPA1/HLA-DRB3/HLA-DRB1/HLA-DPB1/HLA-DRA/LYN/HLA-DQA1/RAC1/HLA-DQB1/HLA-DQA2/HLA-DRB5/TNFRSF14/CD3D/PIK3CA/PPP2R5C/CD3G/PTPN6/PPP2R5E/VAV1/PAK2/CD86
NRP1	Adherens junction	67	0.411356	1.80203	0.00119862	0.0123267	0.00827185	TGFBR2/IQGAP1/TCF7L2/ACTN1/VCL/RAC1/MAPK1/RHOA/FGFR1/PTPRM/CTNNA1/SMAD2/CTNND1/SMAD3/ACTB/SORBS1/EP300/WASF1/ACP1/PTPN6/PARD3/LEF1/RAC2/PTPRB/ACTN2/CTNNA2/SNAI1/MET/SNAI2
NRP1	Nuclear Envelope (NE) Reassembly	54	0.42328	1.77289	0.00129805	0.0128409	0.00861693	TUBB6/VRK2/RAN/NUP155/CHMP4A/LBR/NUP37/NUP54/VPS4A/RANGAP1/SEC13/NUP93/NUP62/SUMO1/NUP43/UBE2I/NUP85/AHCTF1/CCNB1/NUP107/CHMP2B/NUP205/TUBB2B/KPNB1/RCC1/NUP160/PPP2R1A/VRK1/CHMP2A/TUBB3
NRP1	RHOF GTPase cycle	31	0.521226	1.87725	0.00133301	0.0130465	0.00875488	ARHGAP12/MCAM/ACTN1/AKAP12/BASP1/FARP1/VAMP3/CAV1/ADD3/ACTB/SLC4A7/ARHGAP1/CAPZB/SNAP23/SYDE1
NRP1	Intestinal immune network for IgA production	45	0.460933	1.85093	0.00145686	0.0140347	0.00941802	CXCR4/HLA-DPA1/HLA-DRB3/HLA-DRB1/HLA-DPB1/HLA-DMA/HLA-DRA/HLA-DMB/HLA-DQA1/IL15RA/HLA-DQB1/HLA-DQA2/CXCL12/HLA-DRB5/ITGA4/TNFRSF17
NRP1	Photodynamic therapy-induced AP-1 survival signaling.	49	0.432134	1.75752	0.00156273	0.0147914	0.00992583	TRAF5/PDGFRA/MMP2/FOS/MCL1/MAPK13/JUNB/MAP2K6/TNFRSF1A/BCL3/NFE2L2/CFLAR/FAS/BCL2L1/HBEGF/HSP90AA1/MAPK12/IL6
NRP1	Canonical and Non-canonical Notch signaling	21	0.59361	1.96253	0.00156974	0.0147914	0.00992583	JAG1/MFAP2/NOTCH2/ADAM10/NOTCH1/HES1/CHUK/RRAS/NOTCH4/LEF1/JAG2/MAML1/MFAP1/NOTCH3/PSEN1
NRP1	Molecules associated with elastic fibres	35	0.487864	1.82826	0.00169183	0.0153039	0.0102697	ITGAV/LTBP2/ITGB1/FBLN1/LTBP1/MFAP2/FBN1/EFEMP1/ITGB5/BMP4/EFEMP2/FBLN5
NRP1	Neovascularisation processes	36	0.493963	1.86775	0.00169674	0.0153039	0.0102697	JAG1/HIF1A/CXCR4/NOTCH1/MAPK1/CXCL12/SMAD2/SMAD3/MMP9/MAPK9/NOTCH4/TGFB3/TGFB1
NRP1	Cellular response to hypoxia	68	0.396766	1.74345	0.00173275	0.0155525	0.0104366	HIF1A/CUL2/UBE2D1/RBX1/CA9/RPS27A/PSMD6/PSMC4/PSMB5/VEGFA/PSMD14/EP300/PSMD10/PSMC2/PSMA7/PSMC6/UBE2D3/PSMB10/PSMB9/UBC/PSMA3/PSMD1/PSMD7/PSME3/PSMA1/PSMB7/PSMD4/UBA52/PSMB8/PSMD3/PSMC1/PSMD5/PSMB4/EGLN3/PSMA6/PSME2/PSMD2/EGLN1/VHL/PSMA4/PSME4
NRP1	MyD88-independent TLR4 cascade	89	0.366242	1.66877	0.00174941	0.0156258	0.0104857	MAP3K8/MEF2C/DUSP6/UBE2D1/LY96/FOS/S100B/MAPK1/IKBKB/ATF1/CREB1/MAP2K6/RPS27A/CASP8/CHUK/TLR4/RIPK2/TANK/MAPK9/RPS6KA5/BIRC3/UBE2V1/FADD/UBE2D3/TRAF3/FBXW11/TBK1/TNIP2/UBC/RPS6KA2/UBE2N/BTRC/PTPN11/MAP3K7/PPP2R1A/CUL1/IRF3/BIRC2/MAP2K1/SAA1/ATF2/UBA52
NRP1	Chronic myeloid leukemia	71	0.38701	1.71456	0.00181315	0.0161168	0.0108153	TGFBR2/HDAC2/MAPK1/PIK3CD/SHC1/IKBKB/CTBP2/E2F3/CBLB/MYC/SOS1/SMAD3/CHUK/CDK4/HDAC1/KRAS/PIK3CA/TGFB3/BCL2L1/TGFB1/GRB2/STAT5B/TGFB2/TP53/PIK3CB/BCR/STAT5A/CDKN2A/CRKL/PTPN11/GAB2
NRP1	RHOBTB1 GTPase cycle	20	0.581688	1.87801	0.00190261	0.0167502	0.0112403	VIM/RHOBTB1/RBMX/DBN1/ROCK1/MYO6/ROCK2/COPS4/STK38/RNF20/CUL3/RBBP6/CCT7/CCT2
NRP1	Alpha 6 Beta 4 signaling pathway	32	0.506055	1.83989	0.00192263	0.0167661	0.0112509	LAMB1/LAMC1/ITGA6/LAMA5/RAC1/MAPK1/SHC1/RHOA/SOS1/LAMA2/LAMB2/PTK2/LAMA3
NRP1	RHOV GTPase cycle	26	0.540834	1.9055	0.00199966	0.0171933	0.0115376	ARHGAP12/TPM4/IQGAP1/DLG5/NCK2/SPTBN1/NCK1/DST/EPHA2/PAK2
NRP1	Binding and Uptake of Ligands by Scavenger Receptors	46	0.46293	1.87174	0.00206186	0.0174831	0.0117321	COL1A2/STAB1/SPARC/COL3A1/COL4A1/COL4A2/CD163/COL1A1/CD36/IGLV3-25/IGKV1-5/IGLV2-14/COLEC12/IGHA2/COLEC11
NRP1	Recruitment of NuMA to mitotic centrosomes	61	0.409793	1.77417	0.00222641	0.0182883	0.0122724	TUBB6/DYNC1I2/MAPRE1/DYNC1H1/ACTR1A/CLASP1/TUBB/CSNK1E/NME7/CKAP5/TUBGCP5/NEK2/CETN2/CEP135/HSP90AA1/PAFAH1B1/DCTN2/OFD1/CEP192/PLK1/TUBB2B/DCTN3/PPP2R1A/CEP57/DYNLL1/TUBB3/CSNK1D
NRP1	Type II interferon signaling (IFNG)	34	0.48499	1.80771	0.00230334	0.0186702	0.0125287	IFNGR2/IFNGR1/CYBB/JAK1/TAP1/ICAM1/JAK2/IFI6/HLA-B/STAT1/ISG15/PSMB9/CXCL9/IL1B/IRF8/REG1A/PTPN11/CIITA
NRP1	EPH-Ephrin signaling	84	0.36192	1.62785	0.00245303	0.0194576	0.0130571	ARPC2/ACTR3/LYN/MMP2/MYL9/ADAM10/RAC1/LIMK2/ARPC3/NCK2/EPHA3/MYH11/ARPC1B/ARPC1A/RHOA/AP2B1/ARPC5/AP2A2/ACTR2/ACTB/DNM1/SDCBP/MYH9/MMP9/EFNA4/PTK2/ROCK1/EPHA2/PAK2/ROCK2
NRP1	Pathways Affected in Adenoid Cystic Carcinoma	52	0.4344	1.80153	0.0025511	0.0201322	0.0135098	ARID5B/NOTCH1/MORF4L1/SMARCE1/BCOR/ATRX/MYC/NFIB/ATM/PRKDC/PTEN/ARID4B/BRD1/EP300/CHEK1/PIK3CA/MAX/SETD2/JMJD1C/MGA
NRP1	Chromosomal and microsatellite instability in colorectal cancer	69	0.381888	1.68276	0.00256029	0.0201322	0.0135098	TGFBR2/TCF7L2/RAC1/FOS/MAPK1/RHOA/MLH1/SMAD2/MYC/CSNK1A1/SMAD3/RALB/PTGS2/KRAS/MAPK9/TGFB3/MSH2/RALA/TGFB1/LEF1/RAC2/TBK1/TGFB2/TP53
NRP1	The human immune response to tuberculosis	21	0.577346	1.90876	0.002884	0.0218377	0.0146542	IFNGR2/IFNGR1/JAK1/IFITM1/TAP1/JAK2/IFNAR2/MX1/STAT1
NRP1	Cooperation of Prefoldin and TriC/CCT in actin and tubulin folding	23	0.543892	1.85636	0.00298861	0.0225371	0.0151236	TUBB6/PFDN5/PFDN1/CCT5/CCT6A/ACTB/PFDN4/CCT4/TUBB2B/CCT3/PFDN2/CCT7/CCT2/TUBB3/CCT8
NRP1	AURKA Activation by TPX2	50	0.416466	1.69351	0.0030711	0.0228778	0.0153522	DYNC1I2/MAPRE1/DYNC1H1/ACTR1A/CLASP1/TUBB/CSNK1E/CKAP5/NEK2/CETN2/CEP135/HSP90AA1/PAFAH1B1/DCTN2/OFD1/CEP192/PLK1/TPX2/DCTN3/PPP2R1A/CEP57/DYNLL1/CSNK1D/CEP290/NDE1/PRKAR2B/ODF2/CDK5RAP2
NRP1	Regulation of HSF1-mediated heat shock response	70	0.384771	1.69882	0.00314004	0.0232971	0.0156336	SERPINH1/HSPA2/BAG3/TNFRSF21/DNAJB6/MAPK1/HSPB1/NUP155/ATR/ATM/NUP37/NUP50/RPA1/NUP54/SEC13/NUP93/NUP62/HSPA14/TPR/BAG2/NUP43/NUP85/HSPA8/DNAJC7/NUP107/HSPA6/NUP205/NUP210/RANBP2
NRP1	Intraflagellar transport proteins binding to dynein	15	0.614086	1.84614	0.00324828	0.0237176	0.0159157	DYNC1I2/DYNC1H1/DYNLT1/DYNC1LI1/DYNLRB1/DYNC2LI1
NRP1	Aggrephagy	30	0.495634	1.76772	0.00327541	0.0237478	0.0159361	VIM/TUBB6/DYNC1I2/DYNC1H1/RPS27A/DYNC1LI1/UBE2V1/HSP90AA1/CFTR/DYNC1LI2/UBC/UBE2N/VCP/TUBB2B/PARK7/UBA52/DYNC1I1/DYNLL1/TUBB3
NRP1	Potential therapeutics for SARS	71	0.380794	1.68702	0.00330781	0.0237478	0.0159361	IFNGR2/IL1R1/IFNGR1/ITGB1/PHF21A/ATP1B3/HDAC2/JAK1/TUBB/AP2B1/AP2A2/FXYD6/JAK2/ITGA4/ATP1A1/RBBP4/IFNAR2/HDAC1/ARID4B/VEGFA/IMPDH2/ROCK1/HSP90AA1/ATP1A2/FKBP1A/ROCK2
NRP1	FCGR3A-mediated IL10 synthesis	45	0.438416	1.76051	0.00356222	0.0247674	0.0166202	ITPR1/FCGR2A/HCK/ADCY7/LYN/PRKX/CREB1/FCGR1A/IGLV3-25/IGKV1-5/PRKACB/IGLV2-14/IGHG2/FGR/ITPR3/CALM1/CD3G
NRP1	Interleukin-12 family signaling	50	0.411115	1.67175	0.00356705	0.0247674	0.0166202	MSN/ANXA2/RAP1B/JAK1/PPIA/PDCD4/JAK2/STAT3/SOD2/RALA/PAK2/IL12RB2/RPLP0/STAT1/IL27RA/BOLA2B/CAPZA1/SNRPA1
NRP1	TNF related weak inducer of apoptosis (TWEAK) Signaling Pathway	41	0.438379	1.72665	0.00362947	0.0250121	0.0167844	TRAF5/CCL2/RAC1/MAPK1/IKBKB/CASP7/CASP8/CHUK/HDAC1/MMP9/MAPK9/BIRC3/FADD/IL6/TRAF3
NRP1	NOTCH1 Intracellular Domain Regulates Transcription	38	0.452801	1.74581	0.0036667	0.0250517	0.016811	HIF1A/RBX1/HDAC2/NOTCH1/SNW1/MYC/RPS27A/HES1/HDAC4/HDAC1/EP300/TBL1XR1/UBC/HDAC9/MAML1/NCOR1/TLE4/CUL1/NBEA/UBA52
NRP1	Basigin interactions	25	0.506118	1.75392	0.0037881	0.0256254	0.017196	SLC7A7/ITGB1/ATP1B3/ITGA6/SLC7A6/PPIA/CAV1/MMP1/SLC16A3
NRP1	Recruitment of mitotic centrosome proteins and complexes	52	0.422465	1.75204	0.00387323	0.0261053	0.017518	DYNC1I2/MAPRE1/DYNC1H1/ACTR1A/CLASP1/TUBB/CSNK1E/NME7/CKAP5/TUBGCP5/NEK2/CETN2/CEP135/HSP90AA1/PAFAH1B1/DCTN2/OFD1/CEP192/PLK1/DCTN3/PPP2R1A/CEP57/DYNLL1/CSNK1D/CEP290/NDE1/PRKAR2B/ODF2/CDK5RAP2
NRP1	Platelet Adhesion to exposed collagen	14	0.620627	1.84268	0.00399972	0.0266648	0.0178935	COL1A2/ITGB1/FCER1G/LYN/COL1A1/ITGA2
NRP1	Regulation of IFNG signaling	14	0.619528	1.83942	0.00403951	0.0268329	0.0180063	IFNGR2/IFNGR1/JAK1/JAK2/SUMO1/PTPN6/STAT1/PTPN11/PIAS1
NRP1	Signaling by NOTCH1	56	0.402933	1.7018	0.0042421	0.0278304	0.0186756	JAG1/HIF1A/RBX1/ADAM10/HDAC2/NOTCH1/SNW1/MYC/RPS27A/HES1/HDAC4/HDAC1/EP300/NUMB/TBL1XR1/JAG2/UBC/HDAC9/MAML1/NCOR1/TLE4/CUL1/NBEA/UBA52/PSEN1
NRP1	Pancreatic cancer	69	0.367375	1.61881	0.00431955	0.0279804	0.0187763	TGFBR2/RAC1/JAK1/ARHGEF6/MAPK1/PIK3CD/IKBKB/E2F3/SMAD2/STAT3/SMAD3/CHUK/RALB/CDK4/KRAS/VEGFA/PIK3CA/MAPK9/TGFB3/BCL2L1/RALA/TGFB1/STAT1/RAC2/TGFA/TGFB2/TP53/PIK3CB
NRP1	Notch Signaling Pathway Netpath	51	0.41996	1.72391	0.0044036	0.0283308	0.0190115	JAG1/HIF1A/NOTCH2/HDAC2/NOTCH1/SNW1/MYC/JAK2/STAT3/HES1/HDAC1/EP300/NUMB/NOTCH4
NRP1	FCERI mediated Ca+2 mobilization	36	0.465533	1.76025	0.00465782	0.0297583	0.0199694	ITPR1/FCER1G/LYN/LCP2/SHC1/PPP3CB/IGLV3-25/IGKV1-5/SOS1/IGLV2-14/ITPR3/CALM1/VAV1/SYK/VAV3/ITK/GRB2
NRP1	Signaling by TGF-beta Receptor Complex	68	0.366284	1.60951	0.00499976	0.0313978	0.0210696	TGFBR2/BAMBI/WWTR1/UBE2D1/SMURF2/SNW1/RHOA/JUNB/SMAD2/MYC/RPS27A/SMAD3/PPP1CB/HDAC1/SERPINE1/E2F5/CCNT2/ARHGEF18/TGFB1/PARD3/FKBP1A/UBE2D3/PPP1CC/TGIF2/UBC/SP1/RNF111
NRP1	Angiogenesis	24	0.524889	1.80314	0.00503281	0.0314978	0.0211367	HIF1A/TIMP2/PDGFRA/MAPK1/MMP9/VEGFA/PIK3CA/FLT1/PTK2/TIMP3/FGF2/FGFR2
NRP1	Signaling by NOTCH1 PEST Domain Mutants in Cancer	42	0.438255	1.73559	0.00513763	0.0318291	0.021359	JAG1/RBX1/ADAM10/HDAC2/NOTCH1/SNW1/MYC/RPS27A/HES1/HDAC4/HDAC1/EP300/TBL1XR1/JAG2/UBC/HDAC9/MAML1/NCOR1/CUL1/UBA52/PSEN1
NRP1	Inflammatory Response Pathway	30	0.475582	1.69621	0.00565923	0.0339185	0.0227611	LAMB1/COL1A2/COL3A1/LAMC1/COL1A1/LAMA5/THBS1
NRP1	Renal cell carcinoma	66	0.372645	1.62751	0.005729	0.0341097	0.0228894	HIF1A/CUL2/RAP1B/RBX1/RAC1/MAPK1/PIK3CD/SOS1/ARNT2/KRAS/VEGFA/HGF/EP300/PIK3CA/TGFB3/TGFB1/PAK2/RAP1A/TGFA/GRB2/TGFB2/MET/PIK3CB
NRP1	Recycling pathway of L1	34	0.460023	1.71465	0.00575852	0.0341097	0.0228894	TUBB6/MSN/DPYSL2/MAPK1/AP2B1/AP2A2/ACTB/DNM1/NUMB/RPS6KA5/KIF4A/CLTA/RPS6KA2/TUBB2B/ACTG1/AP2M1/DNM3/RDX/TUBB3
NRP1	Selective autophagy	57	0.394271	1.67811	0.00639167	0.0368407	0.0247221	VIM/TUBB6/DYNC1I2/DYNC1H1/RPS27A/MAP1LC3B/ATM/DYNC1LI1/UBE2V1/ATG5/HSP90AA1/CFTR/TOMM7/DYNC1LI2/HSPA8/MFN1/UBC/UBE2N/VCP/TUBB2B/PRKAB1/PARK7/TOMM20/UBA52/DYNC1I1/DYNLL1/CSNK2A2/TUBB3/CSNK2A1/PRKAA2/TOMM22
NRP1	3q29 copy number variation syndrome	49	0.398548	1.62093	0.00646585	0.0370628	0.0248711	HIF1A/ADAM10/DYNLT1/NCBP2/CASP7/MYC/PCYT1A/ATM/DYNLRB1/DYNC2LI1/HAMP/NCBP1/TGFB1/PAK2/MAD2L1BP/RABL2B/UBE2N/GRB2/STAT5B
NRP1	Photodynamic therapy-induced HIF-1 survival signaling	35	0.453729	1.70034	0.00660524	0.0373882	0.0250895	HIF1A/MCL1/BCL2A1/PGK1/IGFBP3/SLC2A3/PTGS2/VEGFA/SERPINE1/TGFB3/HK1/BCL2L1/LDHA/BNIP3L
NRP1	NOTCH1 regulation of human endothelial cell calcification	12	0.643804	1.80774	0.00681802	0.037884	0.0254221	JAG1/MGP/PLAT/NOTCH1/CALU/VEGFA
NRP1	Osteopontin Signaling	13	0.63944	1.82643	0.00718531	0.0389999	0.026171	ITGAV/SPP1/MAPK1/IKBKB/CHUK/MMP9/PLAU
NRP1	Colorectal cancer	60	0.368692	1.5876	0.00729592	0.0391384	0.026264	TGFBR2/TCF7L2/RAC1/FOS/MAPK1/PIK3CD/RHOA/MLH1/SMAD2/MYC/SMAD3/KRAS/PIK3CA/MAPK9/TGFB3/MSH2/TGFB1/LEF1/RAC2/TGFB2/TP53/PIK3CB
NRP1	Type 2 papillary renal cell carcinoma	31	0.473155	1.70412	0.00747675	0.0395836	0.0265627	HIF1A/CUL2/RBX1/CTSK/SFPQ/ARNT2/VEGFA/EP300/TGFB3/SETD2/TFEB/TGFB1/PRCC/TGFA/TGFB2
NRP1	RHO GTPases activate IQGAPs	19	0.556012	1.77503	0.00765553	0.0399042	0.0267778	TUBB6/IQGAP1/RAC1/CTNNA1/ACTB/CALM1
NRP1	MFAP5 effect on permeability and motility of endothelial cells via cytoskeleton rearrangement	18	0.56425	1.78923	0.00782823	0.0404768	0.0271621	ITPR1/ITGAV/ACTN1/VCL/MAPK1/CREB1/PTK2/MYLK
NRP1	CRMPs in Sema3A signaling	14	0.59532	1.76754	0.00811892	0.041832	0.0280715	NRP1/DPYSL2/DPYSL3
NRP1	Other semaphorin interactions	17	0.56594	1.76744	0.00813906	0.041832	0.0280715	TYROBP/ITGB1/PTPRC/PLXND1/PLXNB3/SEMA4D/PLXNA1
NRP1	RAB GEFs exchange GTP for GDP on RABs	57	0.383429	1.63196	0.00858883	0.0432971	0.0290547	RAB31/RIN2/TRAPPC4/RAB8B/RAB32/GDI2/RAB13/HPS4/DENND2D/ANKRD27/CHML/TRAPPC3/RAB3GAP1/RAB1A/RAB8A/RAB38/DENND4B/RAB5C/DENND3/RAB5A
NRP1	T-Cell antigen Receptor (TCR) pathway during Staphylococcus aureus infection	59	0.377862	1.61846	0.00876165	0.0439276	0.0294777	MAP3K8/LCP2/FOS/PTPRC/IKBKB/SOS1/CD3D/CHUK/CDK4/MALT1/AHSA1/NCK1/RRAS/CALM1/PIK3CA/MAPK9/PTPN6/ITK/BCL10/CALM2/GRB2
NRP1	EPHB-mediated forward signaling	41	0.410761	1.61787	0.00879705	0.0439852	0.0295164	ARPC2/ACTR3/LYN/RAC1/LIMK2/ARPC3/ARPC1B/ARPC1A/RHOA/ARPC5/ACTR2/ACTB
NRP1	Hair Follicle Development: Cytodifferentiation - Part 3 of 3	71	0.36127	1.60053	0.00883274	0.044044	0.0295558	PHLDA1/S100A4/DKK3/GTPBP4/NOTCH2/FOS/NOTCH1/TCF4/IGFBP5/BMP4/PROM1/FZD1/SOX9/FOSB/LGR5/EGR2/LHX2/WIF1/DSC2/GAS1/BMPR1A/KRT19/TGFB1/LEF1
NRP1	Human Complement System	93	0.326074	1.50092	0.00934254	0.0459633	0.0308438	LAMB1/CD93/SPP1/LAMC1/VSIG4/ITGB2/C3AR1/LAMA5/THBS1/DCN/C5AR1/F13A1/CD59/PLAUR/ICAM1/PRNP/SELP/ITGA2/CSNK1A1/ADM/SELE/RPS19/C7/PTX3/SELPLG/CD55/TLR2/GNAI3/FPR1/ICAM2
NRP1	STING pathway in Kawasaki-like disease and COVID-19	19	0.545438	1.74128	0.00958652	0.0467883	0.0313974	ITPR1/FCGR2A/IKBKB/CHUK/F3/TBK1/IL1B/NFKBIE
NRP1	Type I collagen synthesis in the context of Osteogenesis imperfecta	28	0.474748	1.68944	0.0097783	0.0472233	0.0316893	COL1A2/ITPR1/SERPINH1/COL1A1/CRTAP/FZD1/LOX/P4HA2/PLOD2
NRP1	FAS signaling pathway ( CD95 )	30	0.457141	1.63043	0.0099816	0.0477043	0.0320121	ARHGDIB/CASP7/CASP8/PRKDC/CFLAR/RIPK2/FAS/PAK2/FADD/FAF1/MAP3K7/DFFB/PAK1/JUN/MAP2K4
NRP1	Gene and protein expression by JAK-STAT signaling after Interleukin-12 stimulation	34	0.443067	1.65145	0.0102123	0.0486804	0.0326671	MSN/ANXA2/RAP1B/PPIA/PDCD4/SOD2/RALA/PAK2/RPLP0/BOLA2B/CAPZA1/SNRPA1
NRP1	RANKL/RANK (Receptor activator of NFKB (ligand)) Signaling Pathway	52	0.387677	1.60776	0.010602	0.0498917	0.0334799	TRAF5/LYN/RAC1/FOS/CTSK/MAPK1/IKBKB/FHL2/ICAM1/MAP2K6/VCAM1/CHUK/MAPK9/PTK2/ACP5/SYK/STAT1/TRAF3
STX11	Peptide GPCRs	66	0.652042	2.42271	1e-10	8e-09	5.21281e-09	GALR2/SSTR4/TACR1/AVPR1A/HCRTR1/CCR9/CXCR3/ATP8A1/GALR1/SSTR5/NPY2R/TACR2/OPRD1/AGTR2/TACR3/CCR8/OPRK1/GNRHR/HCRTR2/MC3R/LHCGR/TSHR/FPR1/CCR10/OPRL1/CCR3/AVPR2/CCKAR/CXCR6/NPY6R/CCKBR/BDKRB1/EDNRA/NMBR/SSTR3/CCR4/NTSR2/OPRM1/NTSR1/GHSR/MC2R/NPY1R/SSTR1/CCR2
STX11	Voltage gated Potassium channels	33	0.732446	2.40824	1.30722e-09	6.0318e-08	3.93033e-08	KCNG2/KCNH1/KCND2/KCNC4/KCND1/KCNB2/KCND3/KCNA10/KCNH7/KCNQ2/KCNC2/KCNC3/KCNH6/KCNA2/KCNV1/KCNS1/KCNA1/KCNC1/KCNQ3/KCNA5/KCNAB3/KCNQ4/KCNAB1/KCNH4/KCNQ1/KCNA4/KCNAB2/KCNG1
STX11	Monoamine GPCRs	31	0.738426	2.40069	3.1357e-09	1.20202e-07	7.83238e-08	ADRA1D/ADRA1B/ADRB3/HTR1B/HTR7/CHRM2/HTR1D/CHRM5/DRD5/ADRA1A/HTR2A/ADRB1/ADRA2B/HTR4/DRD2/HTR6/CHRM4/DRD3/HRH2/DRD4/HTR2C/DRD1/HRH1/HTR5A/ADRA2A
STX11	Amine ligand-binding receptors	36	0.686671	2.29832	3.33018e-08	8.75361e-07	5.70387e-07	ADRA1D/ADRA1B/ADRB3/HTR1B/HTR7/CHRM2/HRH4/HTR1D/CHRM5/DRD5/ADRA1A/HTR2A/ADRB1/ADRA2B/HTR4/DRD2/HTR6/CHRM4/DRD3/HRH2/DRD4/HTR2C/DRD1/HRH1/HTR5A/ADRA2A/HRH3
STX11	Hematopoietic Stem Cell Differentiation	51	0.605342	2.14564	3.31288e-07	6.15726e-06	4.01208e-06	ITGA2B/ITGB3/KITLG/IL5/IKZF1/GYPA/IL1A/ABO/GP9/RUNX1/TPO/NFE2/MYB/RHOH/KLF1/TNXB/CIITA/IL6/CSF1/CBFA2T3/LYL1/CSF2/GATA1/IL3/IL1B/EPO/SPI1/GATA2/VAV1/CSF3/NCKAP1L
STX11	GPCRs, Other	57	0.5992	2.16301	3.75705e-07	6.84452e-06	4.4599e-06	RXFP3/ADRA1D/GPR135/GPR17/CXCR3/GRM1/GPR132/LTB4R2/HTR7/OR7A17/CHRM2/OR2F1/HRH4/OR2H1/GNRHR/OR3A1/HTR2A/GRM8/P2RY11/GPR176/CCKBR/OR2B6/OR7E24/DRD3/OR3A3/OR1G1/EDNRA/CELSR1/NTSR1/GPR162/DRD4/GPR18/CNR1/CCR5/TAAR5/ADORA3/GPR143/OR1F1
STX11	Dilated cardiomyopathy	82	0.523506	2.00311	1.04572e-06	1.68783e-05	1.0998e-05	MYH6/MYH7/ITGA2B/CACNA1C/DES/ITGB3/PRKACG/CACNA1F/ITGB6/ADCY8/MYBPC3/SGCG/CACNB4/ITGA3/CACNG3/ADRB1/ITGB8/ITGB1/CACNG5/SGCD/CACNG2/CACNB3/ITGB4/SGCA/MYL2/ADCY2/TNNT2/ITGA4/CACNB2/SLC8A1/LAMA2/CACNA2D2/CACNG1/ITGA8/CACNB1/CACNA2D3/TGFB3/PLN/TNNI3/TNF/CACNA1S/SGCB/CACNA1D/MYL3/ADCY6/ADCY1/ITGA10/TGFB2/RYR2/ACTC1/ADCY3
STX11	Hematopoietic cell lineage	86	0.520373	2.00082	1.62146e-06	2.48624e-05	1.62004e-05	IL4/ITGA2B/IL11/ITGB3/KITLG/IL5/FCER2/CD22/GP1BB/CR1/GYPA/IL1A/CSF2RA/GP9/TPO/CD1E/IL5RA/DNTT/CD33/ITGA3/IL6/GP5/CSF1/CSF3R/CSF2/CD38/CD1D/IL3/FLT3LG/IL9R/ITGA4/IL1B/IL2RA/EPO/GP1BA/IL3RA/CSF3/CD3G
STX11	Class B/2 (Secretin family receptors)	76	0.515388	1.95616	1.231e-05	0.00015621	0.000101787	VIPR2/CRHR1/WNT6/GIPR/GNG13/GIP/SCT/GHRH/SHH/GLP2R/GNGT2/CRHR2/WNT1/WNT7A/PTH/GNG3/GNB3/ADCYAP1/WNT16/WNT11/PTCH2/WNT2B/GNGT1/WNT7B/GLP1R/FZD9/FZD10/FZD8/IHH/ADCYAP1R1/GCG/VIPR1
STX11	Phosphodiesterases in neuronal function	45	0.580074	2.01591	1.848e-05	0.000219376	0.000142946	PDE6H/GRIA1/PDE6A/GRIN1/PDE4A/PDE1C/ADCY8/NOS1/GRIN2D/PDE7B/PDE6C/PDE4D/CHRFAM7A/CHRNA7/PDE11A/GUCY1A2/DRD2/PDE5A/GRIN2C/GRIN2A/PDE3A/ADCY2/PDE4B/PDE10A/PDE6G/DRD1/PDE2A/PDE1B/GRIN2B/ADCY6/PDE4C/ADCY1/ADCY3/PDE1A
STX11	Dopaminergic Neurogenesis	27	0.664167	2.10063	2.22004e-05	0.000253719	0.000165324	GBX2/GLI2/NKX6-1/FGF8/PITX3/LMX1B/NEUROG2/TH/SHH/WNT1/EN2/SOX2/EN1/RET/NKX2-2
STX11	Autoimmune thyroid disease	52	0.549013	1.9593	2.34099e-05	0.00026589	0.000173254	CD28/IL4/IFNA8/IL5/IFNA4/TPO/IFNA16/TSHR/IFNA5/IFNA6/IL2/IFNA7/CD86/FASLG/CTLA4/HLA-DOA/IFNA2/IL10/IFNA13/TG/IFNA14/IFNA10/IFNA21/CD80
STX11	ECM proteoglycans	70	0.506402	1.89774	3.39788e-05	0.000369946	0.000241058	MATN4/ITGA2B/COL4A3/ITGB3/DSPP/MUSK/ITGB6/IBSP/COL6A1/TNXB/BCAN/TNR/DMP1/ITGB1/HAPLN1/LAMA1/NCAM1/COL4A6/LAMA2/ITGA8/TGFB3/MATN1/LAMA4/ITGAX/PTPRS/BGN/TNC
STX11	Chemokine receptors bind chemokines	49	0.554748	1.95368	3.48528e-05	0.000375024	0.000244366	CCRL2/CCL27/XCR1/CCR9/CXCR3/CCL17/PF4/CCR8/CCL22/CCL1/CCR10/CCR3/CXCR6/CCR4/CCL21/CCL7/CCR2/CCL11/CCR5/CXCL13/CXCL12/CCR1/CCL3/CCL3L1/CCL3L3/CCL5/CCR7/XCL1/PPBP/CCL4/CCL2
STX11	NCAM1 interactions	38	0.594268	2.02519	3.59918e-05	0.000385028	0.000250885	COL4A3/CACNA1C/ST8SIA4/ARTN/COL6A1/PSPN/ST8SIA2/CACNB4/CACNA1G/GFRA4/CACNB3/GFRA2/NCAM1/CACNB2/CACNB1/CACNA1I/GDNF
STX11	Taste transduction	32	0.615576	2.00597	4.69459e-05	0.000485284	0.000316212	CACNA1B/SCNN1B/PRKACG/SCNN1G/TAS2R7/TAS2R13/GNG13/GRM4/ADCY8/GNAT3/GNG3/GNB3/PLCB2/CACNA1A/TAS2R8/TAS2R3/TAS2R9/TAS2R10/TAS2R16/TAS2R1/SCNN1A
STX11	Hypertrophic cardiomyopathy (HCM)	76	0.494943	1.87856	7.08233e-05	0.000689497	0.000449277	MYH6/MYH7/ITGA2B/CACNA1C/DES/ITGB3/CACNA1F/ACE/ITGB6/MYBPC3/SGCG/CACNB4/ITGA3/CACNG3/ITGB8/IL6/ITGB1/CACNG5/SGCD/CACNG2/CACNB3/ITGB4/SGCA/MYL2/TNNT2/ITGA4/CACNB2/SLC8A1/LAMA2/CACNA2D2/CACNG1/ITGA8/CACNB1/CACNA2D3/TGFB3/TNNI3/TNF/CACNA1S/SGCB/CACNA1D
STX11	Selective expression of chemokine receptors during T-cell polarization	29	0.614724	1.974	9.70284e-05	0.000892661	0.00058166	CD28/IL4/IL5/CXCR3/IL12A/IFNG/IL12RB1/IL18R1/CCR3/IL2/CSF2/CCR4/IL12RB2/TGFB3/CCR2/CCR5/IL12B/CCR1/TGFB2/CCL3/CD4/CCR7/CCL4
STX11	Differentiation Pathway	42	0.564514	1.93319	9.97653e-05	0.000908753	0.000592145	INS/IL11/KITLG/FGF8/ALK/TPO/SHH/WNT1/PDGFB/IL6/CSF1/WNT2B/WNT7B/CNTF/IL3/FLT3LG/FGF1/EPO/GDF5/LEFTY1/TGFB3/TNFSF11/WNT2/FGF2/CSF1R/HGF
STX11	Intestinal immune network for IgA production	45	0.543162	1.88763	0.000193741	0.00159858	0.00104164	CD28/IL4/CCL27/IL5/CCR9/ICOSLG/IL6/CCR10/TNFRSF13B/IL2/CD86/ICOS/HLA-DOA/ITGA4/AICDA/IL10/MADCAM1/TNFRSF17
STX11	FGFR2 ligand binding and activation	17	0.70079	1.98309	0.000309178	0.00239028	0.00155751	FGF17/FGF8/FGF18/FGF5/FGF16/FGFBP1/FGF22/FGF23/FGF1/FGF7/FGF20/FGF9/FGF3/FGF2
STX11	Presynaptic depolarization and calcium channel opening	11	0.764418	1.92498	0.000314714	0.0024229	0.00157877	CACNA1B/CACNB4/CACNA1E/CACNA1A/CACNG2/CACNB3/CACNB2/CACNA2D2/CACNB1/CACNA2D3
STX11	Class C/3 (Metabotropic glutamate/pheromone receptors)	21	0.649094	1.9323	0.000316032	0.00242291	0.00157877	GRM7/TAS2R7/GRM1/TAS2R13/GRM4/GRM2/GRM8/GRM3/GRM5/TAS2R8/TAS2R3/TAS2R9/CASR/TAS2R10/TAS2R16/TAS2R1
STX11	Cytokine Network	18	0.676663	1.94594	0.000407037	0.0030338	0.00197683	IL4/IL5/IL9/IL1A/IL17A/IL16/IFNB1/IFNG/IL6/IL2/IL13/IL3/IL10
STX11	Development of ureteric collection system	41	0.542733	1.86185	0.000462112	0.00337837	0.00220135	GRIP1/GLI2/GDF11/RARB/SHH/RARG/HOXD11/WNT11/PAX2/GATA3/ITGB1/RET/HOXA11/CELSR1/SIX1/WT1/LHX1/ITGA8/GDNF/MYCN/GLI3
STX11	Glucagon-type ligand receptors	30	0.578569	1.85649	0.000466801	0.00338155	0.00220342	VIPR2/GIPR/GNG13/GIP/SCT/GHRH/GLP2R/GNGT2/GNG3/GNB3/ADCYAP1/GNGT1/GLP1R/ADCYAP1R1/GCG/VIPR1
STX11	Control of immune tolerance by vasoactive intestinal peptide	13	0.725152	1.92641	0.000530008	0.0037799	0.00246299	CD28/IL4/IL5/IL12A/IFNG/IL2/CD86/CTLA4/IL10/CD80
STX11	Eicosanoid ligand-binding receptors	13	0.724605	1.92496	0.000536847	0.00379922	0.00247558	PTGER3/PTGDR/GPR17/CYSLTR1/LTB4R2/PTGER1/LTB4R/TBXA2R/PTGER2/PTGIR
STX11	Regulation of hematopoiesis by cytokines	14	0.716856	1.95339	0.000645299	0.00449754	0.0029306	IL4/IL11/IL5/IL9/IL6/CSF1/IL2/CSF2/IL3/EPO/CSF3
STX11	Unblocking of NMDA receptors, glutamate binding and activation	20	0.641757	1.89092	0.00066729	0.00461584	0.00300769	DLG2/GRIA4/GRIA1/GRIN1/CAMK2D/DLG4/GRIN2D/NEFL/CAMK2A/GRIN2C/GRIN2A/GRIA3
STX11	Interaction With Cumulus Cells And The Zona Pellucida	10	0.766042	1.86892	0.000697508	0.0048068	0.00313212	ADAM2/ADAM20/ZP4/ADAM30/ADAM21/ZP2/SPAM1
STX11	Interaction between L1 and Ankyrins	29	0.569041	1.82731	0.00073816	0.00503043	0.00327783	SCN7A/ANK1/L1CAM/KCNQ2/SCN2B/SCN4A/SPTA1/SPTB/SCN1A/KCNQ3/SCN10A/SPTBN4/SCN3B/SCN5A/ANK2/NFASC/SPTBN2/SCN11A/ANK3/SCN8A
STX11	Phospholipase C-mediated cascade; FGFR2	17	0.678853	1.92102	0.000843894	0.00562711	0.00366663	FGF17/FGF8/FGF18/FGF5/FGF16/FGF22/FGF23/FGF1/FGF7/FGF20/FGF9/FGF3/FGF2
STX11	Acetylcholine binding and downstream events	14	0.710116	1.93503	0.000844066	0.00562711	0.00366663	CHRNA4/CHRND/CHRNG/CHRNA3/CHRNA1/CHRNA7/CHRNE/CHRNB4/CHRNA5
STX11	Cytokines and Inflammatory Response	32	0.562578	1.83327	0.000865733	0.00575071	0.00374718	IL4/IL11/IL5/IL1A/IFNB1/IFNG/IL6/CSF1/IL2/IL13/CSF2/IL3/IL1B/IL10/CSF3/TGFB3/TNF/IL12B/IL15/TGFB2/HLA-DRB4/CD4
STX11	Small Ligand GPCRs	14	0.708386	1.93031	0.000898964	0.00592865	0.00386312	PTGER3/PTGDR/GPR50/MTNR1B/MTNR1A/PTGER1/TBXA2R/PTGER2/PTGIR/PTAFR/CNR2/CNR1
STX11	Protein-protein interactions at synapses	71	0.457453	1.72274	0.000997471	0.00639494	0.00416695	DLG2/LRRTM4/GRIA4/GRIA1/DLGAP1/GRM1/NTRK3/GRIN1/IL1RAPL2/SHANK1/DLG4/GRIN2D/NLGN3/NRXN1/SLITRK5/NLGN1/LRRTM2/GRM5/PPFIA4/PPFIA2/GRIN2C/GRIN2A/GRIA3/SYT12/IL1RAPL1/HOMER3/EPB41L5/PTPRS/SYT1/GRIN2B/PPFIBP1/STX1A/LIN7B/DLGAP2/SLITRK3/APBA1/NRXN2
STX11	Striated Muscle Contraction	35	0.54021	1.81004	0.00102609	0.00653289	0.00425684	MYH6/DES/TNNC2/TMOD2/MYH8/TNNT3/MYBPC3/TCAP/ACTN3/TNNI1/MYL2/ACTA1/TNNT2/TNNI2/TNNI3/MYBPC2/MYL4/MYL3/MYH3
STX11	Nitric oxide stimulates guanylate cyclase	18	0.654868	1.88326	0.00104797	0.00660946	0.00430674	PRKG2/PRKG1/NOS1/PDE11A/GUCY1A2/PDE5A/KCNMB2/KCNMB1/NOS3/KCNMA1/PDE10A/KCNMB4/PDE2A/PDE1B
STX11	Hedgehog signaling pathway	45	0.510759	1.77502	0.00105332	0.00661471	0.00431016	BMP7/GLI2/WNT6/PRKACG/SHH/BMP8B/WNT1/WNT7A/GAS1/WNT16/WNT11/PTCH2/BMP5/CSNK1G1/WNT2B/WNT7B/IHH/BMP8A/GLI3/WNT3/LRP2/BMP6/WNT2/CSNK1E
STX11	Activation of Matrix Metalloproteinases	31	0.555321	1.8054	0.00108406	0.00678457	0.00442084	MMP25/MMP16/CTRB1/PRSS1/CTRB2/MMP13/MMP8/KLK2/CMA1/SPOCK3/MMP14/TIMP2/MMP10/MMP17/MMP1/PRSS2/TPSAB1/MMP3
STX11	NO/cGMP/PKG mediated Neuroprotection	42	0.512127	1.75379	0.00133859	0.00815565	0.00531424	PRKG2/GRIN1/CNGA3/CNGB1/CAMK2D/NOS1/DLG4/BCL2/GRIN2D/NEFL/IFNG/CAMK2A/GUCY1A2/CNGB3/GRIN2C/GRIN2A/PDE3A/NOS3/IL1B
STX11	Na+/Cl- dependent neurotransmitter transporters	16	0.663096	1.83965	0.00161856	0.00951487	0.00619991	SLC6A6/SLC6A20/SLC6A15/SLC22A2/SLC6A5/SLC6A7/SLC6A13/SLC6A9/SLC6A11/SLC6A2/SLC22A1/SLC18A1
STX11	Effects of PIP2 hydrolysis	22	0.59788	1.79151	0.00162509	0.00952285	0.0062051	DGKQ/RASGRP2/DGKB/TRPC3/PRKCQ/TRPC6/DGKI/DGKE/TRPC7/DGKG
STX11	FGFR3 ligand binding and activation	13	0.693599	1.84259	0.00164376	0.00954107	0.00621698	FGF17/FGF8/FGF18/FGF5/FGF16/FGF23/FGF1/FGF20/FGF9
STX11	FGFR2c ligand binding and activation	13	0.689888	1.83273	0.00175426	0.00996248	0.00649157	FGF17/FGF8/FGF18/FGF5/FGF16/FGF23/FGF1/FGF20/FGF9
STX11	Matrix Metalloproteinases	29	0.551555	1.77116	0.00185762	0.0104847	0.00683188	MMP25/MMP20/MMP16/MMP13/MMP8/MMP23B/MMP19/TIMP4/MMP27/MMP14/MMP28/TIMP2/MMP10/MMP17/TNF/MMP1/MMP3
STX11	Elastic fibre formation	40	0.511631	1.74795	0.00188399	0.0105687	0.00688659	BMP7/ITGB3/BMP10/ITGB6/EMILIN2/MFAP5/ITGB8/ITGB1/ELN/LOXL2/LTBP4/FBLN2/FBN2/ITGA8/GDF5/MFAP4/TGFB3
STX11	Sleep regulation	34	0.534039	1.76929	0.00203234	0.0112636	0.00733938	PTGDR/HCRTR1/MTNR1B/GHRH/TH/NPY2R/HCRTR2/HTR2A/IL6/DRD2/NLGN1/DRD3/GRIN2A/OXT/CACNA1I/STAR/DRD1/ADORA1/IL18
STX11	Oligodendrocyte specification and differentiation, leading to Myelin Components for CNS	26	0.57212	1.78415	0.0020517	0.0112814	0.00735097	OLIG2/GLI2/MOG/MAG/SHH/OMG/SOX10/PDGFB/PLP1/NKX2-2/CNTF/IL1B/MYT1/FGF2/TNF
STX11	Disruption of postsynaptic signalling by CNV	30	0.545017	1.74882	0.00218942	0.0118486	0.00772059	DLG2/ARC/DLGAP1/GRM1/GRIN1/CAMK2D/SHANK1/GRIN2D/NLGN3/NRXN1/RPH3A/CAMK2A/NLGN1/GRIN2C/GRIN2A
STX11	GPCRs, Class B Secretin-like	13	0.683784	1.81652	0.00227915	0.0122621	0.00799001	VIPR2/CRHR1/GIPR/GLP2R/CRHR2/GLP1R/ADCYAP1R1/VIPR1
STX11	Erythrocyte Differentiation Pathway	15	0.664704	1.82662	0.00232772	0.0123786	0.00806592	IL11/KITLG/IL9/IL1A/IL6/CSF2/IL3/EPO/CSF3/TGFB3/FLT3/TGFB2/CCL3
STX11	Phase 0 - rapid depolarisation	25	0.561331	1.74266	0.00240963	0.0126678	0.00825433	SCN7A/CACNA1C/SCN2B/CAMK2D/SCN4A/SCN1A/CAMK2A/SCN10A/CACNB2/CACNA2D2/FGF14/CACNB1/SCN3B/SCN5A/FGF12/SCN11A/CAMK2B/SCN8A
STX11	Development of pulmonary dendritic cells and macrophage subsets	12	0.680037	1.75158	0.00291323	0.0148486	0.00967538	IKZF1/TPO/RUNX2/IRF4/CSF1/CSF2/FLT3LG/SPI1
STX11	ECM-receptor interaction	80	0.40943	1.55728	0.00306454	0.0154064	0.0100388	ITGA2B/ITGB3/GP1BB/LAMB4/ITGB6/SV2C/IBSP/GP9/COL6A1/TNXB/GP6/ITGA3/ITGB8/GP5/TNR/ITGB1/LAMA1/ITGB4/ITGA4/COL4A6/LAMA2/GP1BA/ITGA8
STX11	Molecules associated with elastic fibres	35	0.520008	1.74235	0.00311489	0.0156169	0.010176	BMP7/ITGB3/BMP10/ITGB6/EMILIN2/MFAP5/ITGB8/ITGB1/ELN/LTBP4/FBLN2/FBN2/ITGA8/GDF5/MFAP4/TGFB3
STX11	Development and heterogeneity of the ILC family	29	0.541897	1.74014	0.00318233	0.0158685	0.01034	IL22/IL4/IL5/IL9/IL12A/IL17A/BCL11B/TBX21/IFNG/IL6/GATA3/IL13/IL1B/IL23A/GFI1/IL18/TNF/IL12B
STX11	Crosslinking of collagen fibrils	16	0.63764	1.76903	0.00380918	0.0184931	0.0120502	COL4A3/TLL2/LOXL2/COL4A6/TLL1
STX11	Graft-versus-host disease	41	0.498694	1.71078	0.00389717	0.0187717	0.0122317	CD28/KLRD1/IL1A/KIR2DL5A/KIR3DL1/KIR3DL2/IFNG/IL6/KIR2DL3/IL2/CD86/FASLG/HLA-DOA/IL1B/KLRC1
STX11	Asthma	30	0.52955	1.69919	0.00399349	0.0190363	0.0124041	IL4/IL5/IL9/MS4A2/EPX/PRG2/IL13/IL3/HLA-DOA/IL10/RNASE3/CCL11/TNF
STX11	Interleukin-10 signaling	45	0.482724	1.6776	0.00420746	0.0199016	0.0129679	FCER2/IL1A/IL12A/CCL22/FPR1/IL6/CSF1/CD86/CSF2/IL1RN/IL1B/IL10/CSF3/PTAFR/TNFRSF1B/CD80/CCR2/IL18/TNF/CCR5/IL12B/IL10RA/CCR1/CCL3/CCL3L1/CCL3L3/CCL5/PTGS2/CCL4/CCL2
STX11	Th1/Th2 Differentiation	23	0.56978	1.73589	0.00427927	0.0201894	0.0131554	CD28/IL4/IL12A/IFNG/IL12RB1/IL18R1/IL2/CD86/IL2RA/IL12RB2
STX11	FGFRL1 modulation of FGFR1 signaling	10	0.701615	1.71173	0.00434475	0.0204459	0.0133226	FGF17/FGF8/FGF18/FGF5/FGF22/FGF23/FGF3/FGF2
STX11	Genes controlling nephrogenesis	41	0.495461	1.69969	0.0044781	0.02086	0.0135924	FOXC2/FGF8/LMX1B/FOXD1/SHH/PDGFB/HOXD11/ITGA3/TCF21/PAX2/ITGB1/EYA1/RET/HOXA11/SIX1/WT1/LHX1/ITGA8/NPHS2/GDNF/EMX2/NPHS1/GLI3
STX11	Cardiac Progenitor Differentiation	41	0.494052	1.69485	0.00476857	0.0219462	0.0143002	MYH6/INS/SOX1/TBX5/SOX2/IRX4/ROR2/NKX2-5/MYL2/NCAM1/TNNT2/NANOG/NRG1/TNNI3/SCN5A/FGF2/PDGFRA
STX11	Negative regulation of NMDA receptor-mediated neuronal transmission	20	0.581885	1.71451	0.0047709	0.0219462	0.0143002	DLG2/GRIN1/CAMK4/CAMK2D/DLG4/GRIN2D/NEFL/CAMK2A/GRIN2C/GRIN2A
STX11	Regulation of gene expression in beta cells	16	0.628882	1.74473	0.00486573	0.0221607	0.01444	INS/PDX1/NKX6-1/AKT2/HNF4G/NKX2-2/GCK/NEUROD1
STX11	GPCRs, Class C Metabotropic glutamate, pheromone	15	0.64655	1.77673	0.00495856	0.0225278	0.0146791	GRM7/GRM1/GRM4/GRM2/GRM8/GRM3/GRM5/GPRC5D/CASR
STX11	Striated Muscle Contraction Pathway	38	0.483219	1.64675	0.00520571	0.0235119	0.0153204	MYH6/DES/TNNC2/MYH8/TNNT3/MYBPC3/TCAP/ACTN3/TNNI1/MYL2/ACTA1/TNNT2/TNNI2/TNNI3/MYBPC2/MYL4/MYL3/MYH3/ACTC1/TMOD1/MYOM1/TTN/ACTA2/MYL1/ACTN2
STX11	Regulation of IFNA signaling	26	0.549355	1.71316	0.00521292	0.0235119	0.0153204	IFNA8/SOCS3/IFNA4/IFNA16/IFNB1/IFNA5/IFNA6/PTPN1/IFNA7/IFNA2/IFNA13/SOCS1/IFNA14/IFNA10/IFNA21
STX11	Activation of the phototransduction cascade	11	0.673005	1.69478	0.005253	0.0235745	0.0153612	GNAT1/PDE6A/CNGB1/SAG/GNGT1/RHO/PDE6G/SLC24A1
STX11	FGFR1c ligand binding and activation	11	0.67276	1.69417	0.005253	0.0235745	0.0153612	FGF17/FGF8/FGF5/FGF23/FGF1/FGF20/FGF9/FGF2
STX11	GABA receptor activation	54	0.458389	1.64795	0.00527756	0.023627	0.0153954	GABRR2/GNG13/KCNJ10/ADCY8/GABRA5/GNGT2/KCNJ12/GABRR1/GNAT3/GNG3/KCNJ3/GNB3/GABRB2/KCNJ4/GABRA3/GNGT1/GABRB3/ADCY2/GABRQ/GABRA1/GABRG2/GABRA4/GABRA6/KCNJ15/GABRB1/KCNJ9/KCNJ5/GABRG3/GNG5/ADCY6/ADCY1/GABBR2
STX11	PKC-gamma calcium signaling pathway in ataxia	22	0.570873	1.71058	0.00531772	0.0237491	0.0154749	GRIA4/GRIA1/PRKCG/GRM1/TRPC3/PLCB2/CACNA1A/GNA15/GNA14/GRIA3/CA8
STX11	Ion Channels and Their Functional Role in Vascular Endothelium	12	0.655196	1.6876	0.0055668	0.0245471	0.015995	TRPC5/KCNQ2/TRPC3/GUCY1A2/KCNQ3/KCNQ4/NOS3/TRPC4
STX11	Initial triggering of complement	29	0.523382	1.68069	0.00579175	0.0252531	0.016455	FCN2/IGHG4/IGHV3-48/IGLV6-57/GZMM/FCN1/IGHG1/COLEC10/CFP/CFD/FCN3/C4A/C4B/MBL2/COLEC11/MASP2/IGHV1-69
STX11	LGI-ADAM interactions	10	0.690625	1.68492	0.00584292	0.0253072	0.0164902	ADAM22/LGI1/DLG4/CACNG3/CACNG2/ADAM11/LGI2/ADAM23/STX1A
STX11	FGFR1 ligand binding and activation	14	0.648549	1.76726	0.00596162	0.0256894	0.0167393	FGF17/FGF8/FGF5/FGF22/FGF23/FGF1/FGF20/FGF9/FGF3/FGF2
STX11	Antimicrobial peptides	41	0.486668	1.66952	0.00598411	0.0257115	0.0167536	PRTN3/ART1/DEFA5/DEFA1/DEFA3/PGLYRP1/DEFB126/SLC11A1/SEMG1/GNLY/DEFA4/S100A7/RNASE3/BPI/CAMP/DEFA6/HTN3/CCR2/HTN1/PGLYRP4/PRSS2
STX11	Neurexins and neuroligins	47	0.465483	1.63031	0.00628973	0.0268189	0.0174753	DLG2/LRRTM4/DLGAP1/GRM1/GRIN1/SHANK1/DLG4/GRIN2D/NLGN3/NRXN1/NLGN1/LRRTM2/GRM5/GRIN2C/GRIN2A/SYT12/HOMER3/EPB41L5/SYT1/GRIN2B/STX1A/LIN7B/DLGAP2/APBA1/NRXN2
STX11	Dendritic cells in regulating TH1 and TH2 Development	17	0.622006	1.76015	0.00630354	0.0268189	0.0174753	IL4/IL5/IFNB1/IFNG/CD33/IL13/CSF2/IL3/IL10/ITGAX/CD5/TLR7
STX11	Highly calcium permeable postsynaptic nicotinic acetylcholine receptors	11	0.665024	1.67468	0.0063112	0.0268189	0.0174753	CHRNA4/CHRNA3/CHRNA1/CHRNA7/CHRNB4/CHRNA5/CHRNA2/CHRNA9/CHRNA6
STX11	CD22 mediated BCR regulation	13	0.652433	1.73323	0.00686333	0.0289645	0.0188733	CD22/IGHV3-48/IGLV6-57/CD79B/CD79A/IGHD
STX11	NCAM signaling for neurite out-growth	59	0.430928	1.55679	0.00713961	0.0298219	0.019432	COL4A3/CACNA1C/ST8SIA4/ARTN/COL6A1/PSPN/ST8SIA2/CACNB4/SPTA1/SPTB/CACNA1G/GFRA4/CACNB3/GFRA2/NCAM1/CACNB2/SPTBN4/CACNB1/CACNA1I/GDNF/CACNA1S/SPTBN2/CACNA1D/FYN
STX11	cGMP effects	15	0.632288	1.73754	0.00827695	0.0337685	0.0220036	PRKG2/PRKG1/PDE11A/PDE5A/KCNMB2/KCNMB1/KCNMA1/PDE10A/KCNMB4/PDE2A/PDE1B
STX11	Constitutive Signaling by Aberrant PI3K in Cancer	71	0.41435	1.56042	0.00854111	0.0346924	0.0226056	CD28/KITLG/FGF17/FGF8/NRG2/FGF18/FGF5/PDGFB/ESR1/FGF16/FGF22/FRS2/CD86/FGF23/ICOS/FLT3LG/FGF1/FGF7/FGF20/TRAT1/FGF9/BTC/VAV1/FGF3/NRG1/CD80/FGF2/PIK3CD/PDGFRA/RAC2/ESR2/STRN/FYN/HGF/ERBB4/HBEGF/GAB1/FLT3/KL/EGF
STX11	TRP channels	22	0.553602	1.65883	0.00873485	0.0352917	0.0229962	TRPA1/TRPC5/TRPC3/TRPC6/TRPM1/TRPM2/TRPV5/TRPC7/TRPV1/TRPC4/TRPM3/TRPM8/TRPM6/TRPV6
STX11	Allograft Rejection	82	0.406522	1.55549	0.00878517	0.0352917	0.0229962	IL22/CD28/IL4/FOXP3/IL5/IL1A/IL12A/IL17A/IFNG/IL21/IL2/IL13/GNLY/GABPA/CD86/FASLG/CTLA4/HLA-DOA/IL1B/IL2RA/IL10/CCL21/GDNF/CD80/TNF/PDGFRA/CXCL13/IL12B
STX11	Prader-Willi and Angelman Syndrome	56	0.448784	1.61182	0.00880376	0.0352917	0.0229962	FSHB/INS/GABRR2/POMC/CDKN2B/GHRH/GABRA5/TACR3/GABRR1/BDNF/NHLH2/MKRN3/DLX5/MAGEL2/CDK6/GABRB3/OXT/MDM2/ATP10A/GABRG2/FEZ1/HTR2C/GNRH1/SLC45A2/PCSK1/CDKN2A/CCND2/KISS1/GABRG3
STX11	Type II diabetes mellitus	46	0.442224	1.54407	0.00909033	0.0362039	0.0235905	CACNA1B/INS/IRS4/CACNA1C/PDX1/SOCS3/PIK3CG/ADIPOQ/SLC2A4/CACNA1E/CACNA1A/CACNA1G/GCK/ABCC8/MAPK8/HK1/SOCS1/MAPK10/PIK3R5/HK3/TNF/PIK3CD/CACNA1D
STX11	Eicosanoid Metabolism	21	0.555713	1.65431	0.00929108	0.0367647	0.023956	PTGER3/CYSLTR1/PTGES/PTGER1/TBXA2R/PTGER2/ALOX5/PTGIR/TBXAS1/PLA2G4A/PTGS1/PTGS2/CYSLTR2/PTGER4/PTGIS
STX11	Arrhythmogenic Right Ventricular Cardiomyopathy	68	0.407938	1.51962	0.0094632	0.0372854	0.0242952	ITGA2B/CTNNA3/CACNA1C/DES/ITGB3/CACNA1F/ITGB6/ACTN3/SGCG/CACNB4/ITGA3/CACNG3/ITGB8/ITGB1/CACNG5/SGCD/CACNG2/CACNB3/ITGB4/SGCA/ITGA4/CACNB2/SLC8A1/LAMA2/CACNA2D2/CACNG1/ITGA8/CACNB1
STX11	Arrhythmogenic right ventricular cardiomyopathy (ARVC)	68	0.407938	1.51962	0.0094632	0.0372854	0.0242952	ITGA2B/CTNNA3/CACNA1C/DES/ITGB3/CACNA1F/ITGB6/ACTN3/SGCG/CACNB4/ITGA3/CACNG3/ITGB8/ITGB1/CACNG5/SGCD/CACNG2/CACNB3/ITGB4/SGCA/ITGA4/CACNB2/SLC8A1/LAMA2/CACNA2D2/CACNG1/ITGA8/CACNB1
STX11	Defensins	15	0.623674	1.71387	0.0101913	0.0395076	0.0257432	ART1/DEFA5/DEFA1/DEFA3/DEFB126/DEFA4/DEFA6/CCR2/PRSS2
STX11	Creation of C4 and C2 activators	22	0.544922	1.63282	0.0102539	0.0395076	0.0257432	FCN2/IGHG4/IGHV3-48/IGLV6-57/FCN1/IGHG1/COLEC10/FCN3/MBL2/COLEC11/MASP2/IGHV1-69
STX11	Collagen chain trimerization	33	0.485858	1.59747	0.0104543	0.0399087	0.0260046	COL4A3/COL13A1/COL19A1/COL6A1/COL8A1/COL14A1/COL4A6/COL7A1/COL8A2/COL11A2
STX11	Role of second messengers in netrin-1 signaling	10	0.665598	1.62386	0.0109004	0.0414396	0.0270021	TRPC5/TRPC3/NTN1/TRPC6/TRPC7/TRPC4
STX11	Phase 4 - resting membrane potential	13	0.63682	1.69176	0.0109924	0.0415319	0.0270623	KCNK12/KCNJ12/KCNJ4/KCNK10/KCNK15/KCNK7/KCNK3/KCNJ14
STX11	Glycosaminoglycan biosynthesis - heparan sulfate	21	0.547366	1.62946	0.0115499	0.0431131	0.0280926	HS6ST1/HS3ST3A1/HS3ST1/EXTL1/NDST3/HS3ST3B1/NDST4/EXTL3
STX11	Angiotensin-converting enzyme 2 regulates heart function	13	0.635244	1.68757	0.0115515	0.0431131	0.0280926	COL4A3/ACE/AGTR2/CMA1/COL4A6
STX11	Globo Sphingolipid Metabolism	16	0.598905	1.66156	0.0122427	0.0452342	0.0294747	ST6GALNAC4/ABO/FUT9/B3GALT5/A4GALT/ST8SIA1/B3GALNT1/ST3GAL2/GCNT1/FUT1/ST6GALNAC2/ST6GALNAC5
STX11	Inflammatory Response Pathway	30	0.491664	1.57763	0.0124331	0.0458111	0.0298506	CD28/IL4/IL5/IL5RA/IFNG/IL2/CD86/IL2RA/TNFRSF1B/CD80/LAMC2/ZAP70
STX11	Nucleotide-like (purinergic) receptors	13	0.632699	1.68081	0.0124487	0.0458111	0.0298506	GPR17/P2RY1/P2RY10/P2RY11/P2RY4/ADORA1/P2RY2/P2RY6/ADORA3/P2RY13/ADORA2A/P2RY14
STX11	Nuclear Receptor transcription pathway	51	0.433958	1.53816	0.0126232	0.0463605	0.0302086	NR5A1/RORB/NR6A1/PGR/RARB/RARG/NR2E3/ESR1/HNF4G/PPARA/NR4A3/NR4A1/NR2C2/NR2E1/NCOR2/NR0B1/RXRA/ESR2/THRA/NR2F6/RXRG/NR4A2/NR0B2/ESRRG
STX11	Type I diabetes mellitus	43	0.445328	1.53304	0.012677	0.0463731	0.0302168	INS/CD28/GAD2/IL1A/IL12A/IFNG/IL2/CD86/FASLG/HLA-DOA/IL1B/PTPRN2/LTA/CD80/TNF/IL12B
